1 **Full Title:** A systematic review of MERS-CoV (Middle East Respiratory Syndrome Coronavirus)  
2 seroprevalence and viral RNA prevalence in dromedary camels: implications for animal vaccination

3 **Authors:** Amy Dighe<sup>1\*</sup>, Thibaut Jombart<sup>1,2,3</sup>, Maria D. Van Kerkhove<sup>4</sup> & Neil Ferguson<sup>1</sup>

4 **Affiliations:**

- 5 1. MRC Centre for Global Infectious Disease Analysis, Department of Infectious Disease  
6 Epidemiology, School of Public Health, Imperial College London, United Kingdom
- 7 2. Department of Infectious Disease Epidemiology, London School of Hygiene & Tropical  
8 Medicine, London, United Kingdom
- 9 3. UK Public Health Rapid Support Team, London, United Kingdom
- 10 4. Department of Global Infectious Hazards Management, Health Emergencies Program, World  
11 Health Organization, Geneva Switzerland

12 **\*Corresponding author:** [a.dighe16@imperial.ac.uk](mailto:a.dighe16@imperial.ac.uk) (A.D)

13

14

15

16

17

18

19

20

21

22

23

24

25

26 [Abstract](#)

27 Human infection with Middle East Respiratory Syndrome Coronavirus (MERS-CoV) is driven by  
28 recurring dromedary-to-human spill-over events, leading decision-makers to consider dromedary  
29 vaccination. Dromedary vaccine candidates in the development pipeline are showing hopeful results,  
30 but gaps in our understanding of the epidemiology of MERS-CoV in dromedaries must be addressed  
31 to design and evaluate potential vaccination strategies. We systematically reviewed the published  
32 literature reporting seroprevalence and/or prevalence of active MERS-CoV infection in dromedary  
33 populations from both cross-sectional and longitudinal studies, including 60 studies in our qualitative  
34 syntheses. MERS-CoV seroprevalence increased with age up to 80-100% in adult dromedaries  
35 supporting geographically wide spread endemicity of MERS-CoV in dromedaries in both the Arabian  
36 Peninsula and countries exporting dromedaries from Africa. The high prevalence of active infection  
37 measured in juveniles and at sites where dromedary populations mix should guide further  
38 investigation – particularly of dromedary movement – and inform vaccination strategy design.

39

40

41

42

43

44

45

46

47

48

49

50

## 51 Introduction

52 Since the first human case of Middle East Respiratory Syndrome Coronavirus (MERS-CoV) infection  
53 was detected in 2012 (1), a substantial evidence base has built up showing dromedary camels to be the  
54 zoonotic source of this virus (2). MERS-CoV circulates extensively in dromedary populations causing  
55 no impactful disease. Human infection, however, is associated with a measured case fatality ratio of  
56 around 35% (3). Following spillover events, human-to-human transmission of MERS-CoV is  
57 relatively inefficient and limited to close, unprotected contact environments such as hospitals (4, 5).  
58 Phylogenetic analysis of viral sequences isolated from dromedaries and humans indicates that  
59 hundreds of camel-to-human spillover events are likely to have occurred since 2012 (6). Taken  
60 together, recurring dromedary-to-human transmission is driving ongoing human infection.

61 The key role of dromedaries in human MERS-CoV infection has led decision-makers to consider  
62 dromedary vaccination as part of MERS-CoV prevention interventions (2). Dromedary-targeted  
63 vaccine candidates in the development pipeline are showing promising results and include an  
64 orthopox-virus based vaccine capable of greatly reducing viral shedding in dromedary challenge  
65 studies (7).

66 However, vaccine strategy evaluation is currently precluded by gaps in the understanding of the  
67 epidemiology of MERS-CoV in dromedaries. The dromedary population is highly heterogeneous and  
68 spans a wide geographic area stretching from West Africa through to the Middle East and parts of  
69 Asia. Knowing when and where dromedaries would need to be targeted, and the likely impact of  
70 vaccination, is necessary before further consideration of dromedary vaccination in the wider  
71 socioeconomic and cultural context.

72 Here, we systematically reviewed published studies that measured MERS-CoV antibody  
73 seroprevalence in dromedaries and/or prevalence of viral RNA in dromedaries. Assuming assay  
74 specificity and long-term presence of antibodies after infection, seroprevalence can be used to  
75 estimate what proportion of a dromedary population has ever been infected with MERS-CoV. Broken  
76 down by age class, this can tell us when most animals encounter the infection for the first time.  
77 Additionally, although whole-virus isolation and culture is necessary to confirm whether the shedding

78 is infectious, detection of viral RNA through RT-PCR can be used as a proxy for the prevalence and  
79 distribution of infectious dromedaries (8-10).

80 By conducting a qualitative synthesis of the study findings, considering reported heterogeneities, and  
81 summarising the results of longitudinal studies of infection and immunity, we aim to assess the extent  
82 of current understanding of MERS-CoV epidemiology in dromedaries, implications for control, and  
83 gaps to be addressed going forward. We note that a similar systematic review of the literature up until  
84 May 2018 was unknowingly carried out in parallel to our own (11), with no discussion between the  
85 two groups. Here, we confirm and update the results of the parallel review, discussing our results in  
86 the context of potential animal vaccination and mathematical modelling of MERS-CoV in dromedary  
87 camels.

## 88 [Methods](#)

89 We conducted a systematic review of studies published prior to 31<sup>st</sup> December 2018 reporting  
90 measures of seroprevalence or prevalence of MERS-CoV RNA in dromedary populations by  
91 searching EMBASE (12), MEDLINE (13) and Web of Science (14) using the search strategy in Fig 1.  
92 For a full list of search terms used and corresponding PRISMA flowchart see S1 Appendix and S2  
93 Appendix.

94 *Figure 1. Published studies found with all three of our selected search term groups were then*  
95 *assessed against the exclusion criteria resulting in a final selection of 60 publications.*

96 Records were excluded if they met the following criteria established prior to the search: opinion  
97 pieces, or reviews reporting no new data, studies investigating an aspect of MERS-CoV or another  
98 pathogen that did not involve dromedary samples or involved experimentally infecting dromedaries  
99 with MERS-CoV, and studies not available in English. Remaining studies were categorised as  
100 longitudinal or cross-sectional for qualitative synthesis.

101 When available, we took the results of neutralisation-based testing over methods that determined  
102 seropositivity based on antibody screening tests alone. Neutralising antibody tests are more specific  
103 and are the WHO (World Health Organisation) recommended method for confirming MERS-CoV  
104 seropositivity (9).

105 We extracted RNA prevalence values determined by RT-PCR (reverse-transcription polymerase chain  
106 reaction) of nasal swabs, ignoring any additional samples taken. Use of RT-PCR to test for the  
107 presence of at least two of the established genomic regions unique to MERS-CoV is the WHO and  
108 OIE (World Organisation for Animal Health) standard for detection of active MERS-CoV infection in  
109 dromedaries (9, 10), and viral RNA is most frequently and abundantly present in nasal swabs  
110 compared to other non-invasive samples (15).

111 Throughout this review, we use ‘calf’ to refer to animals under one-year-old, ‘juvenile’  $\leq 2$  years old,  
112 and ‘adult’  $\geq 3$  years old.

## 113 Results

114 Our search retrieved 802 publications. Duplicates were detected and removed in EndNote X8.2 (16),  
115 leaving 414 unique publications. A further 322 records were excluded during abstract screening using  
116 the criteria given above. Of the remaining 92, full text screening proved that a further 30 records met  
117 the exclusion criteria. Two records sampled Bactrian camels (largely restricted to Central Asia, they  
118 have not yet been found to have been infected with MERS-CoV) (17-19), leaving 60 records  
119 pertaining to MERS-CoV seropositivity and/or RNA positivity in dromedaries (Fig 1). 55 of these  
120 described cross-sectional studies of dromedary populations, sampling each animal at a single time-  
121 point only (40 measured seroprevalence and 32 measured RNA prevalence). Note that 6 studies were  
122 designed to investigate groups of dromedaries that had been epidemiologically linked to human cases  
123 of MERS-CoV infection rather than conducting a systematic/random survey. Longitudinal studies that  
124 measured seropositivity and viral RNA shedding in the same animals at multiple time-points, featured  
125 in 11 publications.

## 126 Seroprevalence – cross-sectional studies

127 Various, studies conducted dedicated MERS-CoV sero-surveys, opportunistically tested samples  
128 taken for other means, tested stored sera or sampled dromedaries during human outbreak  
129 investigations. Not all studies used neutralisation-based testing to determine or confirm seropositivity,  
130 and, between those that did, cut-off titres for positivity varied (Table 1).

**Table 1.** Cross-sectional surveys of MERS-CoV seroprevalence and RNA prevalence in camels

| REF  | COUNTRY        | SAMPLE YEAR | SEROPREVALENCE   |                |                     |                 | RNA PREVALENCE     |                |                     | STRATIFICATIONS AVAILABLE                   |
|------|----------------|-------------|------------------|----------------|---------------------|-----------------|--------------------|----------------|---------------------|---------------------------------------------|
|      |                |             | %                | n <sup>a</sup> | Range <sup>b</sup>  | NT <sup>c</sup> | %                  | n <sup>a</sup> | Range <sup>b</sup>  |                                             |
| (20) | Australia      | 2013-14     | 0%               | 307            | -                   | 1:10            | -                  | -              | -                   | -                                           |
| (21) |                | 2014        | 0%               | 25             | -                   | 1:40            | -                  | -              | -                   | -                                           |
| (22) | Bangladesh     | 2015        | 31%              | 55             | -                   | 1:20            | 0%                 | 55             | -                   | age, site type, origin, sex, body condition |
| (23) | Burkina Faso   | 2015        | 80% <sup>d</sup> | 525            | 73-85%              | 1:20            | 5% <sup>d</sup>    | 525            | 0-12%               | Region. Further factors assessed in GLMM    |
| (24) | Canary Islands | 2012-13     | 9%               | 105            | -                   | 1:20            | -                  | -              | -                   | origin                                      |
| (25) |                | 2015        | 4%               | 170            | -                   | -               | -                  | -              | -                   | origin                                      |
| (26) | Egypt          | 1997        | 79%              | 43             | -                   | 1:80            | -                  | -              | -                   | -                                           |
| (27) |                | 2013        | 92%              | 52             | -                   | 1:20            | 4%                 | 110            | 3-30%               | sex                                         |
| (28) |                | 2013        | 94%              | 110            | -                   | 1:20            | -                  | -              | -                   | -                                           |
| (21) |                | 2014        | 100%             | 8              | -                   | 1:40            | -                  | -              | -                   | -                                           |
| (29) |                | 2014-16     | 71%              | 2541           | 59-95% <sup>e</sup> | 1:20            | 15%                | 2825           | 1-36% <sup>e</sup>  | origin, site type, sex, month               |
| (30) |                | 2015-16     | 85%              | 1031           | 77-96% <sup>e</sup> | 1:20            | 4%                 | 1078           | 1-9% <sup>e</sup>   | origin, site type, sex                      |
| (31) | Ethiopia       | 2010-11     | 96% <sup>d</sup> | 188            | 95-100%             | •               | -                  | -              | -                   | region                                      |
| (32) |                | 2013        | 96%              | 66             | -                   | NA              | -                  | -              | -                   | -                                           |
| (23) |                | 2015        | 96% <sup>d</sup> | 632            | 85-99%              | 1:20            | 10% <sup>d</sup>   | 632            | 0-16%               | Region. Further factors assessed in GLMM    |
| (33) | Iraq           | 2014-15     | 85%              | 180            | 85-86%              | -               | -                  | -              | -                   | age, region, sex                            |
| (34) |                | 2015-16     | -                | -              | -                   | -               | 15%                | 100            | 0-35%               | age, region, month                          |
| (35) | Israel         | 2012-17     | 62%              | 411            | -                   | 1:20            | 0%                 | 540            | -                   | -                                           |
| (36) |                | 2013        | 72%              | 71             | -                   | 1:20            | -                  | -              | -                   | sex                                         |
| (37) | Japan          | <2015       | 0%               | 5              | -                   | 1:20            | 0%                 | 4              | -                   | -                                           |
| (38) | Jordan         | 2013        | 100%             | 11             | -                   | 1:20            | -                  | -              | -                   | -                                           |
| (39) |                | 2016        | 82% <sup>d</sup> | 45             | 77-87%              | -               | 62%                | 45             | 48-77%              | age, region, lifestyle                      |
| (17) | Kazakhstan     | 2015        | 0%               | 455            | -                   | 1:20            | -                  | -              | -                   | -                                           |
| (40) | Kenya          | 1992-2013   | 30% <sup>f</sup> | 228            | 0-100%              | -               | -                  | -              | -                   | region, year                                |
| (41) |                | 2013        | 47% <sup>d</sup> | 335            | 14-83%              | -               | -                  | -              | -                   | age, herd, lifestyle, isolation             |
| (42) |                | 2013        | 90%              | NA             | -                   | -               | -                  | -              | -                   | age, region, sex                            |
| (43) |                | 2016-17     | -                | -              | -                   | -               | 0.35% <sup>d</sup> | 1421           | 0-1.2% <sup>d</sup> | region,                                     |
| (44) |                | 2016-18     | 68%              | 1163           | 17-87%              | 1:20            | 0.95% <sup>d</sup> | 1163           | -                   | age, region, sex                            |
| (45) | KSA            | 1992-2010   | 87% <sup>d</sup> | 264            | 77-100%             | -               | -                  | -              | -                   | age, region, year                           |
| (45) |                | 2013        | 74%              | 150            | 66-100%             | -               | 25%                | 202            | 0-66%               | age, region                                 |
| (46) |                | 2015-16     | -                | -              | -                   | -               | 14%                | 44             | 0-23%               | year <sup>g</sup>                           |
| (47) |                | 2016        | 84%              | 171            | -                   | -               | -                  | -              | -                   | age, sex                                    |
| (21) |                | 1993        | 90%              | 131            | 73-96%              | 1:40            | -                  | -              | -                   | region                                      |
| (48) |                | 2012-13     | 90%              | 310            | 85-94%              | 1:20            | -                  | -              | -                   | age, region                                 |
| (49) |                | 2015-17     | -                | -              | -                   | -               | 56%                | 698            | 5-85%               | region, site-type, month, year              |
| (50) |                | 2013-14     | -                | -              | -                   | -               | 29%                | 96             | -                   | age, site, month                            |
| (51) |                | 2014-15     | -                | -              | -                   | -               | 0.12%              | 1309           | -                   | -                                           |
| (52) | Mali           | 2009-10     | 88%              | 562            | 0-91%               | •               | -                  | -              | -                   | region                                      |
| (23) | Morocco        | 2015        | 77% <sup>d</sup> | 343            | 48-100%             | 1:20            | 2% <sup>d</sup>    | 343            | 0-8%                | region. Further factors assessed in GLMM    |
| (53) | Nigeria        | 2015        | 96%              | 131            | -                   | 1:20            | 11%                | 132            | -                   | -                                           |
| (31) |                | 2010-11     | 94%              | 358            | 82-96%              | •               | -                  | -              | -                   | region                                      |
| (54) |                | 2016        | -                | -              | -                   | -               | 3% <sup>d</sup>    | 2529           | 0-8.4% <sup>h</sup> | age, week tested                            |
| (55) | Oman           | 2013        | -                | -              | -                   | -               | 7%                 | 76             | -                   | -                                           |
| (24) |                | 2013        | 100%             | 50             | -                   | 1:20            | -                  | -              | -                   | -                                           |
| (56) | Pakistan       | 2012-15     | 40%              | 565            | 0-83%               | 1:80            | -                  | -              | -                   | region                                      |
| (57) |                | 2015-18     | 76%              | 1050           | 72-80%              | •               | 3% <sup>d</sup>    | 776            | -                   | age, region, sex, lifestyle                 |
| (15) | Qatar          | 2014        | -                | -              | -                   | -               | 79%                | 53             | 67-92%              | -                                           |
| (58) |                | 2014        | 100%             | 33             | -                   | 1:**            | 21% <sup>d</sup>   | 33             | 0-58%               | region                                      |
| (59) |                | 2014        | -                | -              | -                   | -               | 2%                 | 53             | -                   | -                                           |
| (26) | Somalia        | 1983-4      | 81% <sup>d</sup> | 86             | -                   | 1:80            | -                  | -              | -                   | year                                        |
| (26) | Sudan          | 1984        | 82%              | 60             | -                   | 1:80            | -                  | -              | -                   | year                                        |
| (31) | Tunisia        | 2009        | 49% <sup>d</sup> | 204            | 36-100%             | •               | -                  | -              | -                   | region                                      |
| REF  | COUNTRY        | SAMPLEY     | SEROPREVALENCE   |                |                     |                 | RNA PREVALENCE     |                |                     | STRATIFICATIONS                             |

|                                                                                             |              | EAR       | %    | n <sup>a</sup> | Range <sup>b</sup>  | NT <sup>c</sup> | %                 | n <sup>a</sup>   | Range <sup>b</sup> | AVAILABLE |
|---------------------------------------------------------------------------------------------|--------------|-----------|------|----------------|---------------------|-----------------|-------------------|------------------|--------------------|-----------|
| (60)                                                                                        | UAE          | 2003 + 13 | 97%  | 651            | -                   | •               | -                 | -                | -                  | year      |
| (61)                                                                                        |              | 2005      | 82%  | 11             | 0-100% <sup>e</sup> | 1:12            | -                 | -                | -                  | site      |
| (62)                                                                                        |              | 2014      | 93%  | 853            | -                   | -               | 5%                | 871              | -                  | age       |
| (63)                                                                                        |              | <2015     | 95%  | 254            | -                   | -               | 0%                | 254              | -                  | age       |
| (64)                                                                                        |              | 2014      | -    | -              | -                   | -               | 1.6%              | 7803             | -                  | site-type |
| (65, 66)                                                                                    |              | 2015      | -    | -              | -                   | -               | 29% <sup>i</sup>  | 376 <sup>i</sup> | -                  | -         |
| (61)                                                                                        | USA & Canada | 2000-1    | 0%   | 6              | -                   | 1:12            | -                 | -                | -                  | -         |
| <b>STUDIES INVESTIGATING DROMEDARY CAMEL POPULATIONS LINKED TO HUMAN MERS-COV INFECTION</b> |              |           |      |                |                     |                 |                   |                  |                    |           |
| (67)                                                                                        | UAE          | 2012      | -    | -              | -                   | -               | 4%                | 1113             | -                  | farm      |
| (68)                                                                                        | UAE          | 2014      | -    | -              | -                   | -               | 100% <sup>j</sup> | 6 <sup>j</sup>   | -                  | -         |
| (69)                                                                                        | UAE          | 2015      | 100% | 8              | -                   | 1:40            | 100%              | 8                | -                  | -         |
| (70)                                                                                        | KSA          | 2014-16   | 71%  | 595            | 37-100%             | •               | 13%               | 584              | 0-56%              | region    |
| (71)                                                                                        | Qatar        | 2013      | 100% | 14             | -                   | 1:20            | 21%               | 14               | -                  | -         |
| (72)                                                                                        | Qatar        | 2014      | 97%  | 103            | -                   | •               | 59%               | 105              | -                  | -         |
| <b>BACTRIAN CAMELS</b>                                                                      |              |           |      |                |                     |                 |                   |                  |                    |           |
| (18)                                                                                        | Mongolia     | 2014      | 0%   | 190            | -                   | 1:2             | 0%                | 190              | -                  | -         |
| (19)                                                                                        | Mongolia     | 2015      | 0%   | 200            | -                   | 1:2             | 0%                | 200              | -                  | -         |
| (17)                                                                                        | Kazakhstan   | 2015      | 0%   | 95             | -                   | -               | -                 | -                | -                  | -         |

131

- 132 a. total number of camels sampled  
133 b. range across sub-national locations surveyed  
134 c. cut off titre to determine positivity if neutralisation test used.  
135 d. we calculated this value from disaggregated values presented by the authors  
136 e. range given is across site types rather than geographical locations  
137 f. neutralisation at dilution >1:80 gave 15% seropositivity but regional range only available for ELISA results – reported accordingly  
138 g. study also tested different site-types but measured RNA in serum sample rather than nasal swab so this was not included  
139 h. range is across weeks rather than regions  
140 i. both (66) and (65) report RNA prevalence from the same study  
141 j. unclear whether study found negative camels – it only mentions that 6 camels were tested, found positive and viral genomes were isolated  
142 •neutralisation test limited to a subset of samples or only used to detect presence of high titres  
143 \*\* No positivity cut-off titre given but all samples had incredibly high titres, and were able to neutralise at dilution >1:1280  
144

145 Seropositive dromedaries have been found in 20 of the 24 countries studied. See Table 1 and Fig 2 for  
146 a geographical map of seropositivity. MERS-CoV seroprevalence was between 71-100% in most  
147 country-level, age-aggregated study populations across West, North and East Africa and the Middle  
148 East. Exceptions included one of the two studies in Israel (62%), and 4-49% in Bangladesh, the  
149 Canary Islands, and Tunisia as well as one of the two studies in Pakistan and two of the four studies in  
150 Kenya. Samples taken from the large feral camel population in Australia were seronegative, along  
151 with dromedaries in Kazakhstan and in zoos in Japan, and Northern America (17, 20, 21, 24, 37, 61).  
152 No other species tested alongside dromedaries had neutralising antibodies except a small number of  
153 alpacas and llamas living in close quarters with dromedaries in Israel (35), and 1 sheep in Egypt (30).

154 *Figure 2. Measures of MERS-CoV seroprevalence in dromedaries, aggregated at the country*  
155 *level. Total sample size tested is given in parenthesis. Camel density is calculated using*  
156 *FAOSTAT country-level camel population data (73) and World Bank data on country surface*  
157 *area (74) (both for 2016). \*value calculated by us from disaggregated sub-national measures*  
158 *of seroprevalence. Underlined italicised text highlights studies conducted in dromedary*  
159 *populations in response to an epidemiologically linked human MERS-CoV infection.*

160 Factors effecting seroprevalence

161 *Age*

162 MERS-CoV seroprevalence was found to increase with dromedary age in 13 studies (Table 2, Fig 3).  
163 Although seroprevalence was 80-100% in adult dromedaries in most populations across the Middle  
164 East and the horn of Africa, juveniles in the same populations were repeatedly found to have lower  
165 and more variable seroprevalence (~40-90%). One study disaggregated calf age through the first year  
166 of life. In this setting (UAE) calves had high seroprevalence increasing with age to 90% in 7-12-  
167 month-olds (63).

168 *Figure 3. Age stratified seroprevalence measures grouped by available stratification and*  
169 *arranged in order of increasing adult seroprevalence. Bars indicate 95% confidence*  
170 *intervals, calculated by us when not stated in the study, if age class size was available (not*  
171 *available for the population in Mali). \*indicates that calves <1-year-old were not included.*  
172 *\*\*indicates that the study was conducted in dromedary populations in response to an*  
173 *epidemiologically linked human MERS-CoV infection.*

174



**Table 2.** Studies reporting seroprevalence of *C. burnetii* in camels.

| COUNTRY                            | STRATIFIED SEROPREVALENCE                                                                                                               | REPORTED TREND                             | REPORTED SIGNIFICANCE | REF  |
|------------------------------------|-----------------------------------------------------------------------------------------------------------------------------------------|--------------------------------------------|-----------------------|------|
| BANGLADESH                         | <2yrs <b>9%</b> (n = 11)<br>≥2yrs <b>36%</b> (n = 44)                                                                                   | Higher in camels >2yrs                     | Not significant       | (22) |
| BURKINA FASO, ETHIOPIA AND MOROCCO | Generalised Linear Mixed Model (n = 1500)                                                                                               | Increase with age                          | <b>p = 0.032</b>      | (23) |
| EGYPT                              | <2yrs <b>52%</b> (n = 81)<br>≥2yrs <b>87%</b> (n = 950)                                                                                 | Higher in camels >2yrs                     | <b>p &lt; 0.0001</b>  | (30) |
| ETHIOPIA                           | 1- ≤2yrs <b>93%</b> (n = 31)<br>2-13yrs <b>97%</b> (n = 157)                                                                            | None                                       | Not significant       | (31) |
| IRAQ                               | <2yrs <b>89%</b> (n = 44)<br>>2yrs <b>84%</b> (n = 136)<br>2-4yrs 81% (n = 58)<br>>4yrs 86% (n = 78)                                    | Lower in camels 2-4yrs compared with <2yrs | Not significant       | (33) |
| JORDAN                             | ≤2yrs <b>74%</b> <sup>a</sup> (n = 31 <sup>a</sup> )<br>>2yrs <b>100%</b> <sup>a</sup> (n = 14 <sup>a</sup> )                           | ELISA ratio higher in camels >3yrs         | Significant p = NA    | (39) |
| KENYA                              | <2yrs <b>29%</b> <sup>a</sup> (n = 141 <sup>a</sup> )<br>>2yrs <b>61%</b> (n = 194)<br><6m 39% (n = 61)<br>6m-2yrs 21% (n = 80)         | Higher in camels >2yrs than <6m            | <b>p &lt; 0.05</b>    | (41) |
| KENYA                              | 1-4yrs 73% (n = 285)<br>4-6yrs 98% (n = 116)<br>6yrs 98% (n = 476)                                                                      | Higher in camels >4yrs                     | <b>p &lt; 0.05</b>    | (42) |
| KENYA                              | <4yrs 36% (n = 319)<br>>4<7yrs 59% (n = 70)<br>>7yrs 82% (n = 760)                                                                      | Higher in camels >7yrs                     | <b>p &lt; 0.001</b>   | (44) |
| KSA                                | ≤2yrs <b>55%</b> (n = 104)<br>>2yrs <b>95%</b> (n = 98)                                                                                 | Higher in camels >2yrs                     | <b>p &lt; 0.0001</b>  | (45) |
| KSA                                | ≤2yrs <b>73%</b> (n = 77)<br>>2yrs <b>93%</b> (n = 187)                                                                                 | Higher in older animals                    | Not presented         | (45) |
| KSA                                | 1-2yrs <b>93%</b> (n = 71)<br>3-5yrs <b>78%</b> (n = 100)                                                                               | Lower in camels >2yrs                      | <b>p = 0.03</b>       | (47) |
| KSA                                | <1yr <b>72%</b> (n = 65)<br>>1yr <b>95%</b> <sup>a</sup> (n = 245)<br>1-3yrs 95% (n = 106)<br>4-5yrs 97% (n = 76)<br>>5yrs 92% (n = 63) | Higher in camels >1yr                      | <b>p &lt; 0.01</b>    | (48) |
| MALI                               | <2yrs <b>83%</b> (n = NA <sup>b</sup> )<br>3-8yrs 91% (n = NA <sup>b</sup> )<br>9-16yrs 88% (n = NA <sup>b</sup> )                      | None                                       | Not significant       | (52) |
| PAKISTAN                           | ≤3yrs 58% (n = 177)<br>3.1-10yrs 79% (n = 712)<br>>10yrs 81% (n = 161)                                                                  | Lower in animals ≤3yrs                     | <b>p &lt; 0.001</b>   | (57) |
| PAKISTAN                           | ≤2yrs (n = 26/89)<br>2.1-5yrs (n = 62/208)<br>5.1-10yrs (n = 92/180)<br>>10yrs (n = 43/88)                                              | Higher in older animals                    | <b>p &lt; 0.001</b>   | (56) |
| UAE                                | <1yr <b>85%</b> (n = 108)                                                                                                               | Lower in calves <1yr                       | <b>p &lt; 0.05</b>    | (62) |

|                                                                                             |                                                                                                                                                                         |                                  |                  |      |
|---------------------------------------------------------------------------------------------|-------------------------------------------------------------------------------------------------------------------------------------------------------------------------|----------------------------------|------------------|------|
|                                                                                             | >1yr <b>96%</b> <sup>a</sup> (n = 650)<br>2-4yrs 97% (n = 340)<br>>4yrs 96% (n = 310)                                                                                   |                                  |                  |      |
| <b>UAE</b>                                                                                  | <1yr <b>84%</b> (n = 121)<br>>1yrs <b>99%</b> (n = 133)<br>0-3m 75% n = 32<br>4m 79% (n = 14)<br>5-6m 89% (n = 46)<br>7-12 90% (n = 29)                                 | Increase with age                | Not tested       | (63) |
| <b>STUDIES INVESTIGATING DROMEDARY CAMEL POPULATIONS LINKED TO HUMAN MERS-COV INFECTION</b> |                                                                                                                                                                         |                                  |                  |      |
| <b>KSA</b>                                                                                  | ≤2yrs <b>58%</b> (n = 25)<br>>2yrs <b>81%</b> (n = 344)<br>2.1-4yrs 77% <sup>c</sup> (n = 156)<br>4.1-6yrs 81% <sup>c</sup> (n = 98)<br>>6yrs 87% <sup>c</sup> (n = 90) | <i>Higher in camels &gt;2yrs</i> | <i>p = 0.003</i> | (70) |

175  
176  
177

- age stratified results were calculated by us, using disaggregated results presented by authors.
- number of animals in each age class not supplied

178 *Geographic location*

179 Although MERS-CoV seroprevalence is consistently high across West, North, East Africa  
180 and the Middle East at the country level, some studies measured considerable within-country  
181 variation in seroprevalence, particularly in Africa (ranges given in Table 1). In Kenya all  
182 three studies that presented sub-nationally disaggregated results showed seroprevalence to  
183 vary greatly by province. Tunisia, Morocco and Mali also showed considerable regional  
184 seroprevalence variation. Less regional variation in seroprevalence was observed within  
185 Middle Eastern countries.

186 *Sample population characteristics*

187 Several studies found imported animals to have significantly higher seroprevalence than their  
188 locally bred counterparts (22, 25, 29, 30). Dromedaries sampled at markets, abattoirs and  
189 quarantine sites had higher seroprevalence than those in farms, villages and research facilities  
190 (22, 29, 30, 39). In some cases, dromedary origin varied with the type of site sampled  
191 suggesting confounding.

192 In a study conducted across Burkina Faso, Morocco and Ethiopia, dromedaries used for milk  
193 and meat had higher seroprevalence than those used for transport (23). In most of the studies  
194 that stratified by sex, little difference was seen, but in Kenya females had statistically  
195 significantly higher seroprevalence than males (93% vs. 81% in one study (42), and 74% vs.  
196 54% in another (44)) whereas males had significantly higher seroprevalence in Egypt and in  
197 KSA (72% and 84% in males vs. 66% in females) (29, 70).

198 Large and medium herd-size was a significant risk factor for seropositivity across Burkina  
199 Faso, Morocco and Ethiopia, as well as nomadic and sedentary husbandry systems as  
200 opposed to a mixed lifestyle (23). Conversely, in Kenya there was a non-statistically  
201 significant trend for smaller herds to have higher seroprevalence (41). Two other studies in  
202 Kenya showed higher seroprevalence in nomadic herds compared with those kept on ranches

203 or those with agro-pastoralist management. However, ranches were in a different region from  
204 nomadic herds and the sample size for agro-pastoralist management was very small(40, 42).

#### 205 Prevalence of active MERS-CoV infection – cross-sectional studies

206 Our search found that dromedary populations in 16 countries have been tested for MERS-  
207 CoV RNA, 13 of which report positive results indicating active infection. These include KSA  
208 (0.12-56%) (45, 46, 49-51, 70), UAE (0-29% (62-66) or 0-100% if dromedaries  
209 epidemiologically linked to human MERS-CoV cases are included(67-69)), Qatar (22-79%)  
210 (15, 58, 71, 72), Oman (7%) (55), Iraq (15%) (34), and Jordan (62%) (39), as well as Egypt  
211 (4-15%) (27, 29, 30), Ethiopia (10%) (23), Kenya (0.35-0.95%) (43, 44), Nigeria (3-11%)  
212 (53, 54), Burkina Faso (5%) (23), Morocco (2%) (23), and Pakistan (3%) (57). See Fig 4 for a  
213 map of RNA prevalence, and Table 1). Despite moderate seropositivity, surveys have not  
214 detected active MERS-CoV infection in the dromedary populations of Bangladesh or Israel  
215 (22, 35).

216 *Figure 4. Measures of MERS-CoV RNA prevalence in dromedaries, aggregated at the*  
217 *country level. Total sample size tested is given in parenthesis. Camel density is calculated*  
218 *using FAOSTAT country-level camel population data and World Bank data on country*  
219 *surface area (both for 2016). \*value calculated by us from disaggregated sub-national*  
220 *measures of RNA prevalence. Underlined italicised text highlights studies conducted in*  
221 *dromedary populations in response to an epidemiologically linked human MERS-CoV*  
222 *infection.*

#### 223 Factors affecting prevalence of infection

##### 224 Age

225 Age stratified studies in KSA and Jordan found that juveniles had a higher RNA-positivity  
226 than adults (39, 45, 70). RNA-positivity also had an inverse association with age in  
227 dromedaries across Morocco, Burkina Faso and Ethiopia (23). Two studies in Egypt  
228 measured similar positivity rates between juveniles and adults (29, 30).

229

230

### 231 *Sample population characteristics*

232 Higher prevalence of RNA shedding was found in imported animals by three studies in  
233 Egypt, however site-type is a potential confounder, with local camels being sampled from  
234 farms and villages, whilst imported animals were sampled in markets, quarantine centres and  
235 abattoirs (27, 29, 30). A study in KSA sampled both local and imported dromedaries within  
236 live animal markets found that locally-reared animals had significantly higher prevalence of  
237 viral shedding (51). Overall, three studies reported abattoirs and one reported wholesale  
238 markets to be associated with an increase in measured prevalence of shedding compared to  
239 villages, farms and quarantines (23, 46, 51, 64). Much like seroprevalence, RNA positivity  
240 was significantly higher in dromedaries bred for meat or milk compared with those used as  
241 transport in Burkina Faso, Morocco and Ethiopia, and shedding was higher amongst females,  
242 albeit sex and function were highly correlated (23).

### 243 *Potential temporal trends*

244 Five studies measured RNA prevalence at a defined site at multiple points in time. Animals  
245 were not themselves sampled longitudinally. Three studies in Egypt and KSA showed a clear  
246 peak in prevalence of viral RNA shedding from December to May (29, 49, 50). The fourth,  
247 conducted in wholesale markets in KSA, saw lower rates infection during July and August,  
248 and higher positivity in December (51). At an abattoir in Nigeria, no infection was seen from  
249 October to mid-January, with prevalence of infection peaking in February after which no  
250 more samples were taken (54).

### 251 *Evidence of infection and immunity from longitudinal studies*

252 We found 10 longitudinal studies describing 9 incidences of natural infection on farms and in  
253 quarantine facilities – 1 in Egypt (29), 4 in KSA (75-78), 5 in UAE (62, 65, 67, 69, 79) and 1  
254 study taking monthly samples of 430 dromedaries in Kenya (43).

### 255 *Duration of viral shedding*

256 Four studies of natural infection measured viral shedding in dromedaries at approximately  
257 weekly intervals. The maximum time window in which all consecutive nasal samples taken

258 were positive for MERS-CoV RNA ranged from 7-45 days across published studies, with  
259 most positive animals becoming negative within 2 weeks (62, 65, 67, 69). All available  
260 studies followed animals that were found to be MERS-CoV RNA positive at the first instance  
261 of sampling and the duration of shedding prior to sampling is unknown. Further to this,  
262 intermittent RNA shedding, and evidence of potential rapid reinfection/coinfection has been  
263 observed (65, 67).

#### 264 Evidence of Reinfection

265 Three studies have found dromedaries to be shedding MERS-CoV RNA despite having high  
266 antibody titres months or weeks prior to detectable infection. Both older animals whose  
267 antibodies reflect past exposure (29, 76, 79), and young calves whose high antibody titres  
268 were maternally-acquired immediately post-partum, became infected (79).

269 One study directly observed recurring infection amongst a herd of dromedaries in Egypt.  
270 Four animals were shedding 1-3 months prior to a herd-wide epidemic in which they were  
271 RNA-positive once more (29). Sequenced isolates from a market in UAE showed lineage  
272 switching from week to week which is also supportive of rapid reinfection or coinfection in  
273 calves (65).

274 Longitudinal studies also indicated that maternally acquired immunity may offer some  
275 protection. In both studies of calf-mother-pairs conducted in UAE, MERS-CoV infection  
276 became highly prevalent in calves between 4-6 months of age when maternally-acquired  
277 antibody titres had waned (62, 79). Samples from reinfected animals have been found to have  
278 lower viral loads, suggesting that past infection may ameliorate future infections (76). Viral  
279 load and probability of isolating infectious virus were greater when sampling calves, than  
280 adults (44, 79).

#### 281 Discussion

282 The results of our systematic review show that MERS-CoV circulates widely in dromedaries  
283 across the Middle East and Africa, but transmission varies spatially, and temporally. The sub-

284 national range of MERS-CoV seroprevalence appears to be larger in countries outside of the  
285 Arabian Peninsula. Within-country variation in seroprevalence is potentially indicative of  
286 differences in transmission dynamics, meaning vaccine strategy evaluation and mathematical  
287 modelling will need to be conducted at a sub-national resolution.

288 The rise of MERS-CoV seroprevalence from 40-90% in juveniles, to 80-100% in adult  
289 dromedaries across much of West, North and East Africa and the Middle East, is signature of  
290 an endemic disease where the probability of infection increases with time. High  
291 seroprevalence in calves <1-year-old in some populations in UAE and KSA suggests high  
292 transmission intensity in the Arabian Peninsula, with most dromedaries becoming infected  
293 during the first year of life, though maternally acquired antibodies may contribute to  
294 seropositivity in young calves(48, 62, 63). The age-dependent seroprevalence values  
295 synthesised here should be used to fit models of MERS-CoV transmission in dromedaries and  
296 elucidate the likely transmission intensity of the virus in the Middle East and in Africa – a  
297 key parameter for estimating vaccination impact. Reporting finer age stratification of young  
298 dromedaries would allow a better comparison of transmission intensity in different regions  
299 through fitting models of seroconversion.

300 Despite locally-acquired human cases predominantly being reported within the Arabian  
301 Peninsula, the major unilateral trade of camels from the Horn of Africa to the Arabian  
302 Peninsula (80) means that the endemicity of MERS-CoV in African dromedary populations  
303 has implications for the scope of control programs. Viruses isolated in Africa (Egypt,  
304 Ethiopia, Morocco, Nigeria, Burkina Faso and most recently Kenya) have all been classified  
305 into Clade C (with West African isolates comprising sub-clade C1(81)), while only Clades A  
306 and B have been isolated in the Arabian Peninsula (27, 43, 53, 81). Spike region sequences  
307 from Pakistan are similar to those from the Arabian Peninsula (57). Further investigation of  
308 the geographical restrictions of MERS-CoV clades would help clarify the extent to which  
309 MERS-CoV circulates intercontinentally.

310 Age-dependent seroprevalence patterns suggest that the higher prevalence of viral shedding  
311 in juveniles compared with adults is likely due to immunological naivety. The age-  
312 distribution of reported infections synthesised here, suggests that contact with juveniles may  
313 pose greater risks of human transmission than adults, making them potential targets for  
314 vaccination. However, frequency of human contact with dromedaries may also be animal-  
315 age-dependent (62). Calf-focused vaccination may reduce the overall number of dromedary  
316 infections but, the reduced risk of exposure would mean that any remaining infections would  
317 likely occur at an older age than in the absence of vaccination. It will therefore be important  
318 to further investigate the age-dependency of human-dromedary contact patterns and how  
319 these vary in different countries and husbandry systems. Vaccination strategies should be  
320 evaluated, not only on their likely impact on prevalence of active infection in dromedaries,  
321 but also on the age-distribution of infections.

322 Mapping the movement of dromedaries is necessary to understand the underlying spatial  
323 transmission dynamics of MERS-CoV. The mixing of dromedaries underpins interaction  
324 between infectious and susceptible individuals and therefore the dynamics of MERS-CoV  
325 transmission. Live markets and abattoirs which both had higher prevalence of RNA shedding  
326 compared to other site-types in multiple studies, are key locations for animal mixing(23, 28,  
327 51, 64). Quantitative data describing the movement and trading patterns of dromedary  
328 populations will be essential for informing models and considering where potential  
329 vaccination should take place. A role for markets as drivers of disease dissemination is  
330 characteristic of other zoonotic diseases such as avian influenza (82, 83).

331 More evidence is required to establish whether MERS-CoV infection in dromedaries is  
332 seasonal. The temporal studies in this review observed a peak in prevalence of active  
333 infection between December and June (29, 49-51). These were conducted in Egypt and KSA  
334 where dromedary calving occurs between October and February (84-86), and Nigeria which  
335 has a similar calving season (87). Assuming seasonal calving was driving the trend, and



336 calves become susceptible between 4-6 months (62, 79), we might expect the number of  
337 susceptible dromedaries to peak between January and May – which overlaps with the peaks  
338 observed. If infection is driven by seasonal calving vaccination would need to occur annually  
339 prior to the infection of newly susceptible calves. Based on phylogenetic analysis of MERS-  
340 CoV genomes isolated from humans and dromedaries, a seasonal period of elevated risk of  
341 zoonotic transmission was estimated to exist from April through to July (6), however, this is  
342 not seen consistently in the epidemiology of primary human MERS-CoV cases reported to  
343 WHO (88). Further investigation of potential seasonality has been highlighted as a priority by  
344 the FAO-OIE-WHO MERS-CoV Technical Working Group (2).

345 The results of longitudinal studies included in this review demonstrate re-infection of  
346 dromedaries despite high titres of MERS-CoV specific antibodies being present in their sera.  
347 Unfortunately, the degree and duration of protection afforded by maternally-acquired  
348 antibodies and those acquired from infection is unclear. Informative surveys of a better proxy  
349 for protective immunity in dromedaries would improve the accuracy of models of reinfection  
350 and the likely effects of vaccination.

351 Although we found maximum duration of RNA shedding to range from 7-45 days across  
352 studies, intermittent shedding or rapid reinfection has been seen to occur for 6 weeks which  
353 complicates interpretation of RT-PCR derived RNA shedding results for infectious period. A  
354 controlled challenge study in 4 dromedaries performed daily sampling and saw the maximum  
355 duration of shedding to be 35 days post inoculation, with infectious virus (as determined by  
356 plaque assay) isolatable for the first 7 days (89). However, the biological relevance of the  
357 challenge dose is not known. More frequent sampling that includes genotyping and captures  
358 of the onset of shedding is needed to more accurately estimate the duration of infectiousness  
359 following a single natural infection.

360 Limitations of our study include that a single author completed the systematic search and data  
361 extraction. The available studies exhibit differences in study design, criteria for

362 seropositivity, sample-site type and sample population characteristics. Some studies report  
363 that the latter two variables are associated with statistically significant differences in  
364 seroprevalence or prevalence of infection within individual studies (23, 29, 30, 39, 40, 51,  
365 64). These heterogeneities made quantitative pooling inappropriate.

366 Available studies do not include camel dense regions of northern Africa or Rajasthan, India,  
367 and Yemen. In addition to the countries included in this systematic review of the published  
368 literature, OIE has received reports of RNA positive camels in Iran and Kuwait (90, 91).  
369 Members at WHO and FAO (Food and Agriculture Organisation of the United Nations)  
370 confirm that further RNA testing studies are planned or underway in several countries in  
371 Africa (e.g. Ethiopia, Kenya, Egypt, Somalia, Sudan, Algeria and Morocco) and in the  
372 Middle East (e.g. Jordan), as well as countries in South East Asia (e.g. Pakistan) (personal  
373 communication, Maria D. Van Kerkhove).

#### 374 **Conclusions**

375 Our findings provide strong evidence that MERS-CoV is endemic in dromedary populations  
376 across much of West, North, East Africa and the Middle East, in agreement with the similar  
377 systematic review conducted in parallel with our own (11). Calves are likely to play a central  
378 role in sustaining circulation of MERS-CoV and should be a target of potential dromedary  
379 vaccination. However, the potential for mass vaccination of calves to change the age  
380 distribution of infected individuals should be investigated through mathematical modelling of  
381 transmission dynamics in dromedary populations and considered in the context of age-  
382 dependent human-camel contact frequency patterns. Sites where dromedaries mix may also  
383 play a role in driving transmission. A better understanding of dromedary husbandry and trade  
384 patterns, as well as quarantine facilities, is needed to identify where dromedaries are infected  
385 with MERS-CoV – critical for focussing potential vaccination strategies. Although in a few  
386 studies, prevalence of infection appears to peak in the first half of the year, which may be  
387 facilitated by the increase in susceptible animals after the calving season, further studies are

388 needed to confirm this. Further longitudinal studies are required to investigate the temporal  
389 dynamics of viral shedding and immunity in the animal host and should ideally be capable of  
390 distinguishing co-circulating MERS-CoV lineages.

391 These remaining gaps in our understanding of MERS-CoV transmission dynamics in  
392 dromedary populations agree with the prioritized research outlined in the FAO-OIE-WHO  
393 Technical Working group report (2) and must be addressed to obtain a clearer picture of what  
394 an optimal vaccination strategy would involve, as well as its likely impact, before  
395 implementation can be considered further.

## 396 Acknowledgements

397 None

## 398 References

- 399 1. Zaki AM, van Boheemen S, Bestebroer TM, Osterhaus AD, Fouchier RA. Isolation of a novel  
400 coronavirus from a man with pneumonia in Saudi Arabia. *The New England journal of*  
401 *medicine*. 2012;367(19):1814-20.  
402
- 403 2. FAO-OIE-WHO MERS Technical Working Group . MERS: Progress on the global response,  
404 remaining challenges and the way forward. *Antiviral Res*. 2018;159:35-44.  
405
- 406 3. World Health Organisation. WHO MERS-CoV Global Summary and Assessment of Risk  
407 [Internet]. Geneva: WHO; 2018. Available from:  
408 [https://www.who.int/csr/disease/coronavirus\\_infections/risk-assessment-august-](https://www.who.int/csr/disease/coronavirus_infections/risk-assessment-august-2018.pdf?ua=1)  
409 [2018.pdf?ua=1](https://www.who.int/csr/disease/coronavirus_infections/risk-assessment-august-2018.pdf?ua=1) [Accessed September 2018].  
410
- 411 4. Breban R, Riou J, Fontanet A. Interhuman transmissibility of Middle East respiratory  
412 syndrome coronavirus: estimation of pandemic risk. *Lancet*. 2013;382(9893):694-9.  
413
- 414 5. Cauchemez S, Van Kerkhove MD, Riley S, Donnelly CA, Fraser C, Ferguson NM.  
415 Transmission scenarios for Middle East Respiratory Syndrome Coronavirus (MERS-CoV)  
416 and how to tell them apart. *Euro Surveill*. 2013;18(24).  
417
- 418 6. Dudas G, Carvalho LM, Rambaut A, Bedford T. MERS-CoV spillover at the camel-human  
419 interface.[Erratum appears in *Elife*. 2018 Apr 19;7:; PMID: 29669683]. *eLife*. 2018;7(01):16.  
420
- 421 7. Haagmans BL, van den Brand JM, Raj VS, Volz A, Wohlsein P, Smits SL, et al. An  
422 orthopoxvirus-based vaccine reduces virus excretion after MERS-CoV infection in dromedary  
423 camels. *Science*. 2016;351(6268):77-81.  
424
- 425 8. Corman V, Eckerle I, Bleicker T, Zaki A, Landt O, Eschbach-Bludau M, et al. Detection of a  
426 novel human coronavirus by real-time reverse-transcription polymerase chain reaction.  
427 *Eurosurveillance*. 2012;17(39).  
428

- 429 9. Laboratory Testing for Middle East Respiratory Syndrome Coronavirus, Interim Guidance  
430 [Internet]. Geneva, Switzerland: World Health Organization; 2018  
431 (WHO/MERS/LAB/15.1/Rev1/2018). Licence: CC BY-NC-SA 3.0 IGO Available from:  
432 [https://www.who.int/csr/disease/coronavirus\\_infections/mers-laboratory-testing/en/](https://www.who.int/csr/disease/coronavirus_infections/mers-laboratory-testing/en/)  
433 [Accessed September 2018].  
434
- 435 10. OIE - World Organisation for Animal Health. Middle East Respiratory Syndrome  
436 Coronavirus (MERS-CoV) Case definition for reporting to OIE 2017[Internet]. Available  
437 from: [http://www.oie.int/scientific-expertise/specific-information-and-](http://www.oie.int/scientific-expertise/specific-information-and-recommendations/mers-cov/)  
438 [recommendations/mers-cov/](http://www.oie.int/scientific-expertise/specific-information-and-recommendations/mers-cov/). [Accessed September 2018].  
439
- 440 11. Sikkema R, Farag E, Islam M, Atta M, Reusken C, Al-Hajri MM, et al. Global status of  
441 Middle East respiratory syndrome coronavirus in dromedary camels: a systematic review.  
442 *Epidemiol Infect.* 2019;147.  
443
- 444 12. Elsevier B.V. *Embase Classic+Embase 1947 to 2018 December 31*. [Database] Ovid  
445 Wolters Kluwer. Available from: [http://ovidsp.tx.ovid.com/sp-](http://ovidsp.tx.ovid.com/sp-3.32.0a/ovidweb.cgi?&S=BCCGFPDLLKDDGPKGNCCKCCLBGDPNAA00&New+Database=Single%7c4)  
446 [3.32.0a/ovidweb.cgi?&S=BCCGFPDLLKDDGPKGNCCKCCLBGDPNAA00&New+Datab](http://ovidsp.tx.ovid.com/sp-3.32.0a/ovidweb.cgi?&S=BCCGFPDLLKDDGPKGNCCKCCLBGDPNAA00&New+Database=Single%7c4)  
447 [ase=Single%7c4](http://ovidsp.tx.ovid.com/sp-3.32.0a/ovidweb.cgi?&S=BCCGFPDLLKDDGPKGNCCKCCLBGDPNAA00&New+Database=Single%7c4) [Accessed 31<sup>st</sup> December 2018].  
448
- 449 13. National Library of Medicine. *Ovid MEDLINE(R) ALL 1946 to December 31, 2018*.  
450 [Database] Ovid Wolters Kluwer. Available from: [http://ovidsp.tx.ovid.com/sp-](http://ovidsp.tx.ovid.com/sp-3.32.0a/ovidweb.cgi?&S=BCCGFPDLLKDDGPKGNCCKCCLBGDPNAA00&New+Database=Single%7c7)  
451 [3.32.0a/ovidweb.cgi?&S=BCCGFPDLLKDDGPKGNCCKCCLBGDPNAA00&New+Datab](http://ovidsp.tx.ovid.com/sp-3.32.0a/ovidweb.cgi?&S=BCCGFPDLLKDDGPKGNCCKCCLBGDPNAA00&New+Database=Single%7c7)  
452 [ase=Single%7c7](http://ovidsp.tx.ovid.com/sp-3.32.0a/ovidweb.cgi?&S=BCCGFPDLLKDDGPKGNCCKCCLBGDPNAA00&New+Database=Single%7c7) [Accessed 31<sup>st</sup> December 2018].  
453
- 454 14. Clarivate Analytics. *Web of Science*. [Database] Clarivate Analytics. Available  
455 from: [http://apps.webofknowledge.com/WOS\\_GeneralSearch\\_input.do?product=WOS&search](http://apps.webofknowledge.com/WOS_GeneralSearch_input.do?product=WOS&search_mode=GeneralSearch&SID=D12CW4GmjGuwicdeqUC&preferencesSaved=)  
456 [h\\_mode=GeneralSearch&SID=D12CW4GmjGuwicdeqUC&preferencesSaved=](http://apps.webofknowledge.com/WOS_GeneralSearch_input.do?product=WOS&search_mode=GeneralSearch&SID=D12CW4GmjGuwicdeqUC&preferencesSaved=) [Accessed  
457 31<sup>st</sup> December 2018].  
458
- 459 15. Mohran KA, Farag E, Reusken C, Raj VS, Lamers MM, Pas SD, et al. The sample of choice  
460 for detecting Middle East respiratory syndrome coronavirus in asymptomatic dromedary  
461 camels using real-time reverse-transcription polymerase chain reaction. *Revue Scientifique Et*  
462 *Technique-Office International Des Epizooties.* 2016;35(3):905-11.  
463
- 464 16. Clarivate Analytics. EndnoteX8.2. (Version X8.2) [Software] Clarivate Analytics. 2018.  
465
- 466 17. Miguel E, Perera RA, Baubekova A, Chevalier V, Faye B, Akhmetsadykov N, et al. Absence  
467 of Middle East Respiratory Syndrome Coronavirus in Camelids, Kazakhstan, 2015. *Emerging*  
468 *Infectious Diseases.* 2016;22(3):555-7.  
469
- 470 18. Chan SM, Damdinjav B, Perera RA, Chu DK, Khishgee B, Enkhbold B, et al. Absence of  
471 MERS-Coronavirus in Bactrian Camels, Southern Mongolia, November 2014. *Emerging*  
472 *Infectious Diseases.* 2015;21(7):1269-71.  
473
- 474 19. Liu R, Wen Z, Wang J, Ge J, Chen H, Bu Z. Absence of Middle East respiratory syndrome  
475 coronavirus in Bactrian camels in the West Inner Mongolia Autonomous Region of China:  
476 Surveillance study results from July 2015. *Emerging Microbes and Infections.* 2015;4 (no  
477 pagination)(e73).  
478
- 479 20. Crameri G, Durr PA, Barr J, Yu M, Graham K, Williams OJ, et al. Absence of MERS-CoV  
480 antibodies in feral camels in Australia: Implications for the pathogen's origin and spread. *One*  
481 *Health.* 2015;1:76-82.  
482
- 483 21. Hemida MG, Perera RA, Al Jassim RA, Kayali G, Siu LY, Wang P, et al. Seroepidemiology  
484 of Middle East respiratory syndrome (MERS) coronavirus in Saudi Arabia (1993) and  
485 Australia (2014) and characterisation of assay specificity. *Euro Surveill.* 2014;19(23):12.  
486

- 487 22. Islam A, Epstein JH, Rostal MK, Islam S, Rahman MZ, Hossain ME, et al. Middle East  
488 Respiratory Syndrome Coronavirus Antibodies in Dromedary Camels, Bangladesh, 2015.  
489 Emerging Infectious Diseases. 2018;24(5):926-8.  
490
- 491 23. Miguel E, Chevalier V, Ayelet G, Ben Bencheikh MN, Boussini H, Chu DK, et al. Risk  
492 factors for MERS coronavirus infection in dromedary camels in Burkina Faso, Ethiopia, and  
493 Morocco, 2015. Euro Surveill. 2017;22(13):30.  
494
- 495 24. Reusken C, Haagmans BL, Muller MA, Gutierrez C, Godeke GJ, Meyer B, et al. Middle East  
496 respiratory syndrome coronavirus neutralising serum antibodies in dromedary camels: a  
497 comparative serological study. Lancet Infectious Diseases. 2013;13(10):859-66.  
498
- 499 25. Gutierrez C, Tejedor-Junco MT, Gonzalez M, Lattwein E, Renneker S. Presence of antibodies  
500 but no evidence for circulation of MERS-CoV in dromedaries on the Canary Islands, 2015.  
501 Euro Surveill. 2015;20(37).  
502
- 503 26. Muller MA, Corman VM, Jores J, Meyer B, Younan M, Liljander A, et al. MERS coronavirus  
504 neutralizing antibodies in camels, Eastern Africa, 1983-1997. Emerging Infectious Diseases.  
505 2014;20(12):2093-5.  
506
- 507 27. Chu DKW, Poon LLM, Gomaa MM, Shehata MM, Perera R, Abu Zeid D, et al. MERS  
508 Coronaviruses in Dromedary Camels, Egypt. Emerging Infectious Diseases. 2014;20(6):1049-  
509 53.  
510
- 511 28. Perera RA, Wang P, Gomaa MR, El-Shesheny R, Kandeil A, Bagato O, et al.  
512 Seroepidemiology for MERS coronavirus using microneutralisation and pseudoparticle virus  
513 neutralisation assays reveal a high prevalence of antibody in dromedary camels in Egypt, June  
514 2013. Euro Surveill. 2013;18(36):pii=20574.  
515
- 516 29. Ali MA, Shehata MM, Gomaa MR, Kandeil A, El-Shesheny R, Kayed AS, et al. Systematic,  
517 active surveillance for Middle East respiratory syndrome coronavirus in camels in Egypt.  
518 Emerging Microbes & Infections. 2017;6(1):e1.  
519
- 520 30. Ali M, El-Shesheny R, Kandeil A, Shehata M, Elsokary B, Gomaa M, et al. Cross-sectional  
521 surveillance of Middle East respiratory syndrome coronavirus (MERS-CoV) in dromedary  
522 camels and other mammals in Egypt, August 2015 to January 2016.[Erratum appears in Euro  
523 Surveill. 2017 May 11;22(19); PMID: 28537549]. Euro Surveill. 2017;22(11):16.  
524
- 525 31. Reusken CBEM, Messadi L, Feyisa A, Ullaramu H, Godeke GJ, Danmarwa A, et al.  
526 Geographic distribution of MERS coronavirus among dromedary camels, Africa. Emerging  
527 Infectious Diseases. 2014;20(8):1370-4.  
528
- 529 32. Fukushi S, Fukuma A, Kurosu T, Watanabe S, Shimojima M, Shirato K, et al.  
530 Characterization of novel monoclonal antibodies against the MERS-coronavirus spike protein  
531 and their application in species-independent antibody detection by competitive ELISA.  
532 Journal of Virological Methods. 2018;251:22-9.  
533
- 534 33. Thwiny HT, Al Hamed TA, Nazzal AR. Seroepidemiological study of Middle East  
535 respiratory syndrome (MERS) virus infection in Iraqi dromedary camels. Veterinarski Arhiv.  
536 2018;88(2):191-200.  
537
- 538 34. Al Salihi SF, Alrodhan MA. Phylogenetic Analysis of MERSCoV in Human and Camels in  
539 Iraq. International Journal of Pharmaceutical Research and Allied Sciences. 2017;6(1):120-9.  
540
- 541 35. David D, Rotenberg D, Khinich E, Erster O, Bardenstein S, van Straten M, et al. Middle East  
542 respiratory syndrome coronavirus specific antibodies in naturally exposed Israeli llamas,  
543 alpacas and camels. One Health. 2018;5:65-8.  
544

- 545 36. Harcourt JL, Rudoler N, Tamin A, Leshem E, Rasis M, Giladi M, et al. The prevalence of  
546 Middle East respiratory syndrome coronavirus (MERS-CoV) antibodies in dromedary camels  
547 in Israel. *Zoonoses Public Health*. 2018;31:31.  
548
- 549 37. Shirato K, Azumano A, Nakao T, Hagihara D, Ishida M, Tamai K, et al. Middle East  
550 respiratory syndrome coronavirus infection not found in camels in Japan. *Japanese Journal of*  
551 *Infectious Diseases*. 2015;68(3):256-8.  
552
- 553 38. Reusken CB, Ababneh M, Raj VS, Meyer B, Eljarah A, Abutarbush S, et al. Middle East  
554 Respiratory Syndrome coronavirus (MERS-CoV) serology in major livestock species in an  
555 affected region in Jordan, June to September 2013. *Euro Surveill*. 2013;18(50):20662.  
556
- 557 39. van Doremalen N, Hijazeen ZS, Holloway P, Al Omari B, McDowell C, Adney D, et al. High  
558 Prevalence of Middle East Respiratory Coronavirus in Young Dromedary Camels in Jordan.  
559 *Vector borne zoonotic dis*. 2017;17(2):155-9.  
560
- 561 40. Corman VM, Jores J, Meyer B, Younan M, Liljander A, Said MY, et al. Antibodies against  
562 MERS coronavirus in dromedary camels, Kenya, 1992-2013. *Emerging Infectious Diseases*.  
563 2014;20(8):1319-22.  
564
- 565 41. Deem SL, Fevre EM, Kinnaird M, Browne AS, Muloi D, Godeke GJ, et al. Serological  
566 Evidence of MERS-CoV Antibodies in Dromedary Camels (*Camelus dromedaries*) in  
567 Laikipia County, Kenya.[Erratum appears in *PLoS One*. 2017 May 18;12 (5):e0178310;  
568 PMID: 28542448]. *PLoS ONE*. 2015;10(10):e0140125.  
569
- 570 42. Munyua P, Corman VM, Bitek A, Osoro E, Meyer B, Muller MA, et al. No Serologic  
571 Evidence of Middle East Respiratory Syndrome Coronavirus Infection Among Camel  
572 Farmers Exposed to Highly Seropositive Camel Herds: A Household Linked Study, Kenya,  
573 2013. *Am J Trop Med Hyg*. 2017;96(6):1318-24.  
574
- 575 43. Kiambi S, Corman VM, Sitawa R, Githinji J, Ngoci J, Ozomata AS, et al. Detection of  
576 distinct MERS-Coronavirus strains in dromedary camels from Kenya, 2017. *Emerging*  
577 *microbes & infections*. 2018;7(1):195.  
578
- 579 44. Ommeh S, Zhang W, Zohaib A, Chen J, Zhang H, Hu B, et al. Genetic Evidence of Middle  
580 East Respiratory Syndrome Coronavirus (MERS-Cov) and Widespread Seroprevalence  
581 among Camels in Kenya. *Virologica Sinica*. 2018:1-9.  
582
- 583 45. Alagaili AN, Briese T, Mishra N, Kapoor V, Sameroff SC, Burbelo PD, et al. Middle East  
584 respiratory syndrome coronavirus infection in dromedary camels in Saudi Arabia.[Erratum  
585 appears in *MBio*. 2014;5(2):e01002-14 Note: Burbelo, Peter D [added]]. *mBio*.  
586 2014;5(2):e00884-14.  
587
- 588 46. Alfuwaires M, Altaher A, Alhafufi A, Kandeel M. Middle East Respiratory Syndrome  
589 Coronavirus in healthy and diseased dromedaries. *Journal of Camel Practice and Research*.  
590 2017;24(3):217-20.  
591
- 592 47. Harrath R, Abu Duhier FM. Sero-prevalence of Middle East respiratory syndrome  
593 coronavirus (MERS-CoV) specific antibodies in dromedary camels in Tabuk, Saudi Arabia.  
594 *Journal of Medical Virology*. 2018;90(8):1285-9.  
595
- 596 48. Hemida MG, Perera RA, Wang P, Alhammadi MA, Siu LY, Li M, et al. Middle East  
597 Respiratory Syndrome (MERS) coronavirus seroprevalence in domestic livestock in Saudi  
598 Arabia, 2010 to 2013. *Euro Surveill*. 2013;18(50):20659.  
599
- 600 49. Kasem S, Qasim I, Al-Doweriej A, Hashim O, Alkarar A, Abu-Obeida A, et al. The  
601 prevalence of Middle East respiratory Syndrome coronavirus (MERS-CoV) infection in

- 602 livestock and temporal relation to locations and seasons. *Journal of Infection and Public*  
603 *Health*. 2018;29:29.
- 604
- 605 50. Khalafalla AI, Lu X, Al-Mubarak AI, Dalab AH, Al-Busadah KA, Erdman DD. MERS-CoV  
606 in Upper Respiratory Tract and Lungs of Dromedary Camels, Saudi Arabia, 2013-2014.  
607 *Emerging Infectious Diseases*. 2015;21(7):1153-8.
- 608
- 609 51. Sabir JS, Lam TT, Ahmed MM, Li L, Shen Y, Abo-Aba SE, et al. Co-circulation of three  
610 camel coronavirus species and recombination of MERS-CoVs in Saudi Arabia. *Science*.  
611 2016;351(6268):81-4.
- 612
- 613 52. Falzarano D, Kamissoko B, de Wit E, Maiga O, Cronin J, Samake K, et al. Dromedary camels  
614 in northern Mali have high seropositivity to MERS-CoV. *One Health*. 2017;3:41-3.
- 615
- 616 53. Chu DK, Oladipo JO, Perera RA, Kuranga SA, Chan SM, Poon LL, et al. Middle East  
617 respiratory syndrome coronavirus (MERS-CoV) in dromedary camels in Nigeria, 2015. *Euro*  
618 *Surveill*. 2015;20(49).
- 619
- 620 54. So RT, Perera RA, Oladipo JO, Chu DK, Kuranga SA, Chan K-h, et al. Lack of serological  
621 evidence of Middle East respiratory syndrome coronavirus infection in virus exposed camel  
622 abattoir workers in Nigeria, 2016. *Eurosurveillance*. 2018;23(32).
- 623
- 624 55. Nowotny N, Kolodziejek J. Middle East respiratory syndrome coronavirus (MERS-CoV) in  
625 dromedary camels, Oman, 2013. *Euro Surveill*. 2014;19(16):20781.
- 626
- 627 56. Saqib M, Sieberg A, Hussain MH, Mansoor MK, Zohaib A, Lattwein E, et al. Serologic  
628 Evidence for MERS-CoV Infection in Dromedary Camels, Punjab, Pakistan, 2012-2015.  
629 *Emerging Infectious Diseases*. 2017;23(3):550-1.
- 630
- 631 57. Zohaib A, Saqib M, Athar MA, Chen J, Khan S, Taj Z, et al. Countrywide survey for MERS-  
632 Coronavirus antibodies in dromedaries and humans in Pakistan. *Virologica Sinica*.  
633 2018;33(5):410-7.
- 634
- 635 58. Reusken CB, Farag EA, Jonges M, Godeke GJ, El-Sayed AM, Pas SD, et al. Middle East  
636 respiratory syndrome coronavirus (MERS-CoV) RNA and neutralising antibodies in milk  
637 collected according to local customs from dromedary camels, Qatar, April 2014. *Euro*  
638 *Surveill*. 2014;19(23):12.
- 639
- 640 59. Raj VS, Farag EA, Reusken CB, Lamers MM, Pas SD, Voermans J, et al. Isolation of MERS  
641 coronavirus from a dromedary camel, Qatar, 2014. *Emerging Infectious Diseases*.  
642 2014;20(8):1339-42.
- 643
- 644 60. Meyer B, Muller MA, Corman VM, Reusken CB, Ritz D, Godeke GJ, et al. Antibodies  
645 against MERS coronavirus in dromedary camels, United Arab Emirates, 2003 and 2013.  
646 *Emerging Infectious Diseases*. 2014;20(4):552-9.
- 647
- 648 61. Alexandersen S, Kobinger GP, Soule G, Wernery U. Middle East respiratory syndrome  
649 coronavirus antibody reactors among camels in Dubai, United Arab Emirates, in 2005.  
650 *Transbound Emerg Dis*. 2014;61(2):105-8.
- 651
- 652 62. Wernery U, Corman VM, Wong EY, Tsang AK, Muth D, Lau SK, et al. Acute middle East  
653 respiratory syndrome coronavirus infection in livestock Dromedaries, Dubai, 2014. *Emerging*  
654 *Infectious Diseases*. 2015;21(6):1019-22.
- 655
- 656 63. Wernery U, El Rasoul IH, Wong EY, Joseph M, Chen Y, Jose S, et al. A phylogenetically  
657 distinct Middle East respiratory syndrome coronavirus detected in a dromedary calf from a  
658 closed dairy herd in Dubai with rising seroprevalence with age. *Emerging Microbes &*  
659 *Infections*. 2015;4(12):e74.

- 660  
661 64. Yusof MF, Eltahir YM, Serhan WS, Hashem FM, Elsayed EA, Marzoug BA, et al.  
662 Prevalence of Middle East respiratory syndrome coronavirus (MERS-CoV) in dromedary  
663 camels in Abu Dhabi Emirate, United Arab Emirates. *Virus Genes*. 2015;50(3):509-13.  
664  
665 65. Yusof MF, Queen K, Eltahir YM, Paden CR, Al Hammadi Z, Tao Y, et al. Diversity of  
666 Middle East respiratory syndrome coronaviruses in 109 dromedary camels based on full-  
667 genome sequencing, Abu Dhabi, United Arab Emirates. *Emerging Microbes & Infections*.  
668 2017;6(11):e101.  
669  
670 66. Li Y, Khalafalla AI, Paden CR, Yusof MF, Eltahir YM, Al Hammadi ZM, et al. Identification  
671 of diverse viruses in upper respiratory samples in dromedary camels from United Arab  
672 Emirates. *PLoS ONE [Electronic Resource]*. 2017;12(9):e0184718.  
673  
674 67. Muhairi SA, Hosani FA, Eltahir YM, Mulla MA, Yusof MF, Serhan WS, et al.  
675 Epidemiological investigation of Middle East respiratory syndrome coronavirus in dromedary  
676 camel farms linked with human infection in Abu Dhabi Emirate, United Arab Emirates. *Virus*  
677 *Genes*. 2016;52(6):848-54.  
678  
679 68. Paden CR, Yusof M, Al Hammadi ZM, Queen K, Tao Y, Eltahir YM, et al. Zoonotic origin  
680 and transmission of Middle East respiratory syndrome coronavirus in the UAE. *Zoonoses and*  
681 *Public Health*. 2018;65(3):322-33.  
682  
683 69. Al Hammadi ZM, Chu DK, Eltahir YM, Al Hosani F, Al Mulla M, Tarnini W, et al.  
684 Asymptomatic MERS-CoV Infection in Humans Possibly Linked to Infected Dromedaries  
685 Imported from Oman to United Arab Emirates, May 2015. *Emerging Infectious Diseases*.  
686 2015;21(12):2197-200.  
687  
688 70. Kasem S, Qasim I, Al-Hufofi A, Hashim O, Alkarar A, Abu-Obeida A, et al. Cross-sectional  
689 study of MERS-CoV-specific RNA and antibodies in animals that have had contact with  
690 MERS patients in Saudi Arabia. *Journal of Infection and Public Health*. 2018;11(3):331-8.  
691  
692 71. Haagmans BL, Al Dhahiry SH, Reusken CB, Raj VS, Galiano M, Myers R, et al. Middle East  
693 respiratory syndrome coronavirus in dromedary camels: an outbreak investigation. *Lancet*  
694 *Infect Dis*. 2014;14(2):140-5.  
695  
696 72. Farag EA, Reusken CB, Haagmans BL, Mohran KA, Stalin Raj V, Pas SD, et al. High  
697 proportion of MERS-CoV shedding dromedaries at slaughterhouse with a potential  
698 epidemiological link to human cases, Qatar 2014. *Infect Ecol Epidemiol*. 2015;5:28305.  
699  
700 73. FAOSTAT [Internet]. 2016. Available from: <http://www.fao.org/faostat/en/>. [Accessed  
701 September 2018]  
702  
703 74. The World Bank: Land Area [Internet]. 2016. Available from:  
704 <https://data.worldbank.org/indicator/AG.LND.TOTL.K2>. [Accessed September 2018]  
705  
706 75. Azhar EI, El-Kafrawy SA, Farraj SA, Hassan AM, Al-Saeed MS, Hashem AM, et al.  
707 Evidence for camel-to-human transmission of MERS coronavirus. *New England Journal of*  
708 *Medicine*. 2014;370(26):2499-505.  
709  
710 76. Hemida MG, Alnaeem A, Chu DK, Perera RA, Chan SM, Almathen F, et al. Longitudinal  
711 study of Middle East Respiratory Syndrome coronavirus infection in dromedary camel herds  
712 in Saudi Arabia, 2014-2015. *Emerging microbes & infections*. 2017;6(6):e56.  
713  
714 77. Hemida MG, Chu DKW, Poon LLM, Perera R, Alhammadi MA, Ng HY, et al. MERS  
715 Coronavirus in Dromedary Camel Herd, Saudi Arabia. *Emerging Infectious Diseases*.  
716 2014;20(7):1231-4.  
717



- 718 78. Memish ZA, Cotten M, Meyer B, Watson SJ, Alshahafi AJ, Al Rabeeah AA, et al. Human  
719 infection with MERS coronavirus after exposure to infected camels, Saudi Arabia, 2013.  
720 *Emerging Infectious Diseases*. 2014;20(6):1012-5.  
721
- 722 79. Meyer B, Juhasz J, Barua R, Das Gupta A, Hakimuddin F, Corman VM, et al. Time Course of  
723 MERS-CoV Infection and Immunity in Dromedary Camels. *Emerging Infectious Diseases*.  
724 2016;22(12):2171-3.  
725
- 726 80. Younan M, Bornstein S, Gluecks IV. MERS and the dromedary camel trade between Africa  
727 and the Middle East. *Trop Anim Health Prod*. 2016;48(6):1277-82.  
728
- 729 81. Chu DKW, Hui KPY, Perera R, Miguel E, Niemeyer D, Zhao JC, et al. MERS coronaviruses  
730 from camels in Africa exhibit region-dependent genetic diversity. *Proceedings of the National  
731 Academy of Sciences of the United States of America*. 2018;115(12):3144-9.  
732
- 733 82. Fournié G, Tripodi A, Nguyen TTT, Tran TT, Bisson A, Pfeiffer DU, et al. Investigating  
734 poultry trade patterns to guide avian influenza surveillance and control: a case study in  
735 Vietnam. *Scientific Reports*. 2016;6:29463.  
736
- 737 83. Gilbert M, Golding N, Zhou H, Wint GW, Robinson TP, Tatem AJ, et al. Predicting the risk  
738 of avian influenza A H7N9 infection in live-poultry markets across Asia. *Nature  
739 communications*. 2014;5:4116.  
740
- 741 84. Almutairi SE, Boujenane I, MUSAAD A, Awad-Acharari F. Non-genetic factors influencing  
742 reproductive traits and calving weight in Saudi camels. *Trop Anim Health Prod*.  
743 2010;42(6):1087-92.  
744
- 745 85. Hemida MG, Elmoslemayn A, Al-Hizab F, Alnaeem A, Almathen F, Faye B, et al.  
746 Dromedary Camels and the Transmission of Middle East Respiratory Syndrome Coronavirus  
747 (MERS-CoV). *Transbound Emerg Dis*. 2017;64(2):344-53.  
748
- 749 86. Ali A, Derar D, Alsharari A, Alsharari A, Khalil R, Almundarij TI, et al. Factors affecting  
750 reproductive performance in dromedary camel herds in Saudi Arabia. *Trop Anim Health  
751 Prod*. 2018;50(5):1155-60.  
752
- 753 87. Abdussamad A, Holtz W, Gauly M, Suleiman M, Bello M. Reproduction and breeding in  
754 dromedary camels: insights from pastoralists in some selected villages of the Nigeria-Niger  
755 corridor. *Livestock Research for Rural Development*. 2011;23(8):2011.  
756
- 757 88. Al-Tawfiq JA, Memish ZA. Lack of seasonal variation of Middle East Respiratory Syndrome  
758 Coronavirus (MERS-CoV). *Travel medicine and infectious disease*. 2018.  
759
- 760 89. Adney DR, van Doremalen N, Brown VR, Bushmaker T, Scott D, de Wit E, et al. Replication  
761 and shedding of MERS-CoV in upper respiratory tract of inoculated dromedary camels.  
762 *Emerging Infectious Diseases*. 2014;20(12):1999-2005.  
763
- 764 90. OIE - World Organisation for Animal Health. Infection with Coronavirus in camels, Iran  
765 [Internet]. Available from:  
766 [http://www.oie.int/wahis\\_2/public/wahid.php/Reviewreport/Review?page\\_refer=MapFullEve  
767 ntReport&reportid=16411](http://www.oie.int/wahis_2/public/wahid.php/Reviewreport/Review?page_refer=MapFullEventReport&reportid=16411) [Accessed December 2018]
- 768
- 769 91. OIE - World Organisation for Animal Health. Immediate notification of MERS-CoV in  
770 Kuwait [Internet]. 2014. Available from:  
771 [http://www.oie.int/wahis\\_2/public/wahid.php/Reviewreport/Review?page\\_refer=MapFullEve  
772 ntReport&reportid=15407](http://www.oie.int/wahis_2/public/wahid.php/Reviewreport/Review?page_refer=MapFullEventReport&reportid=15407) [Accessed December 2018]

773

774 [Supporting information captions](#)

775 S1 Appendix: database specific breakdown of the search strategy and search terms used

776 S2 Appendix: PRISMA flow chart

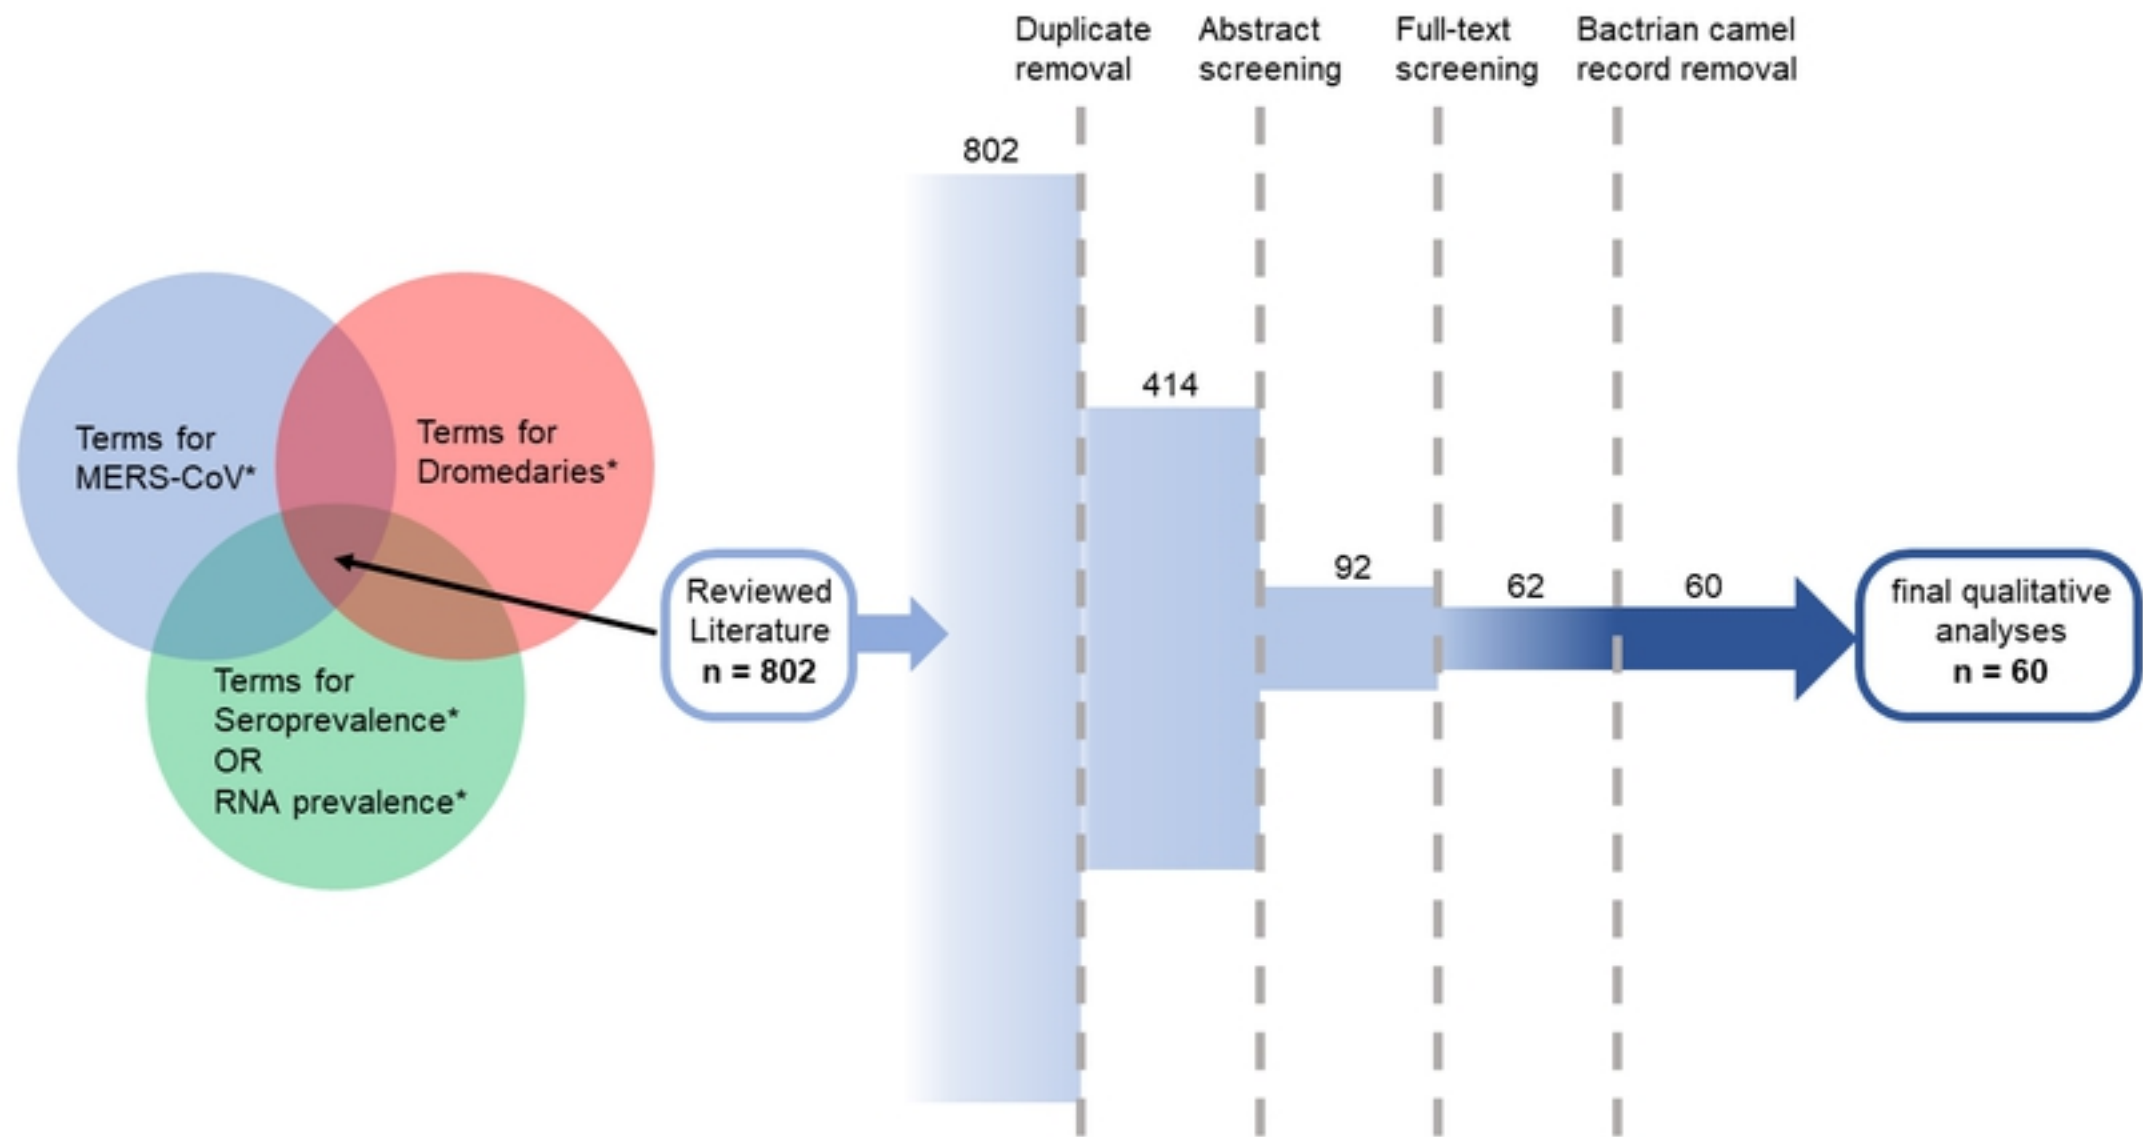

Fig1

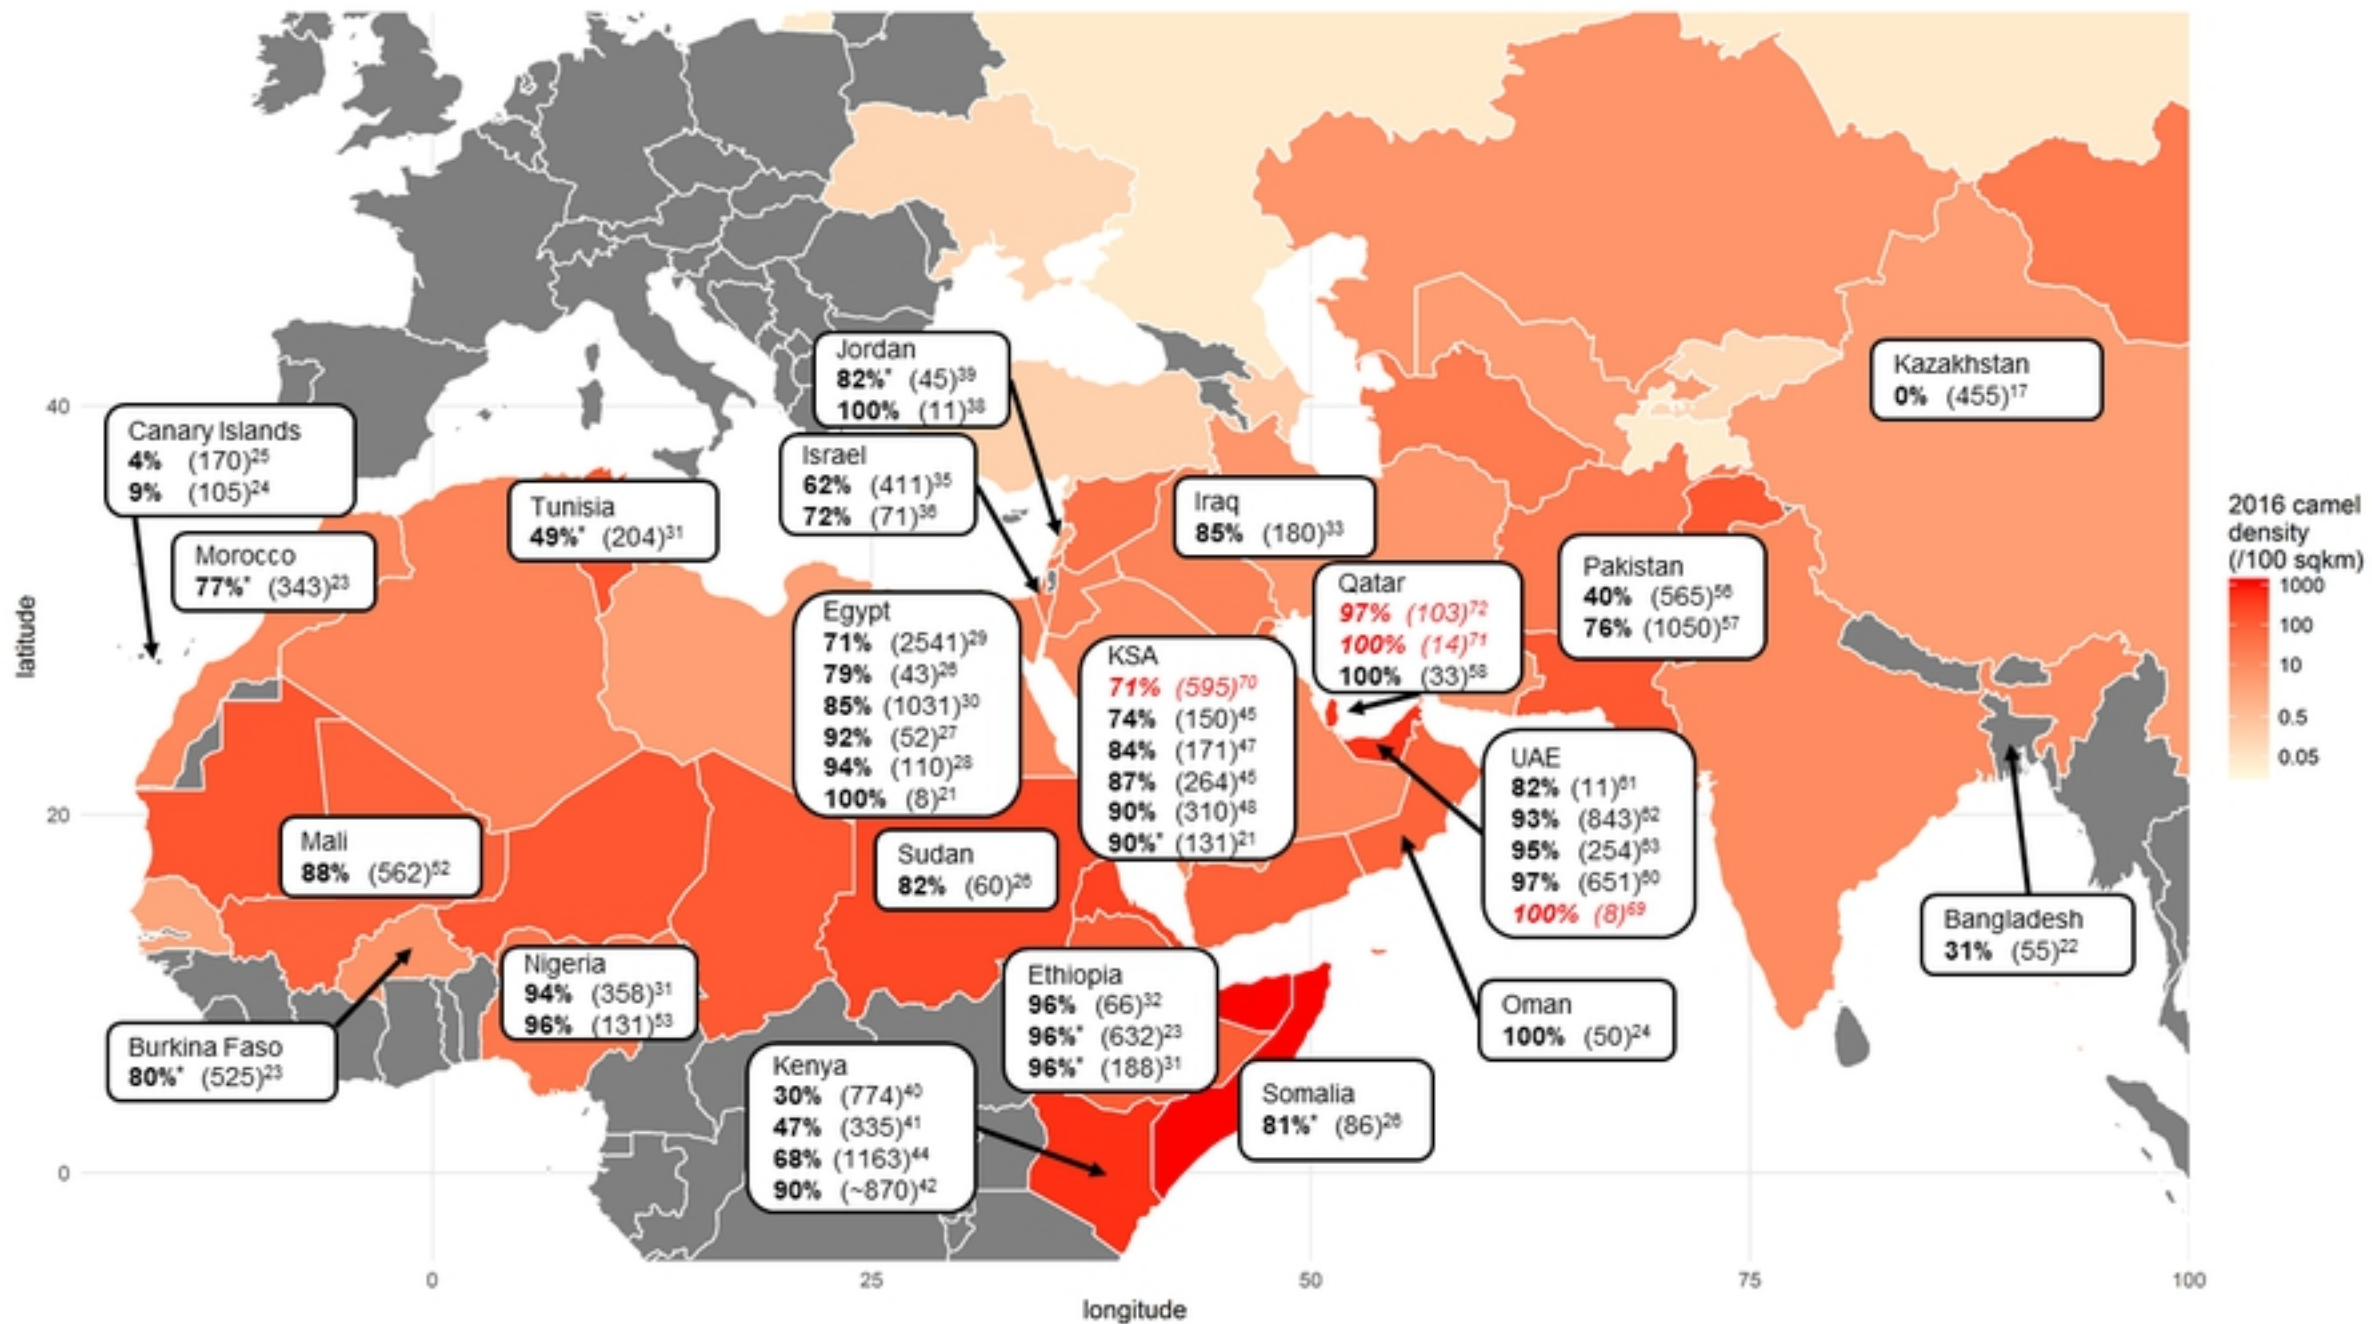

Fig2

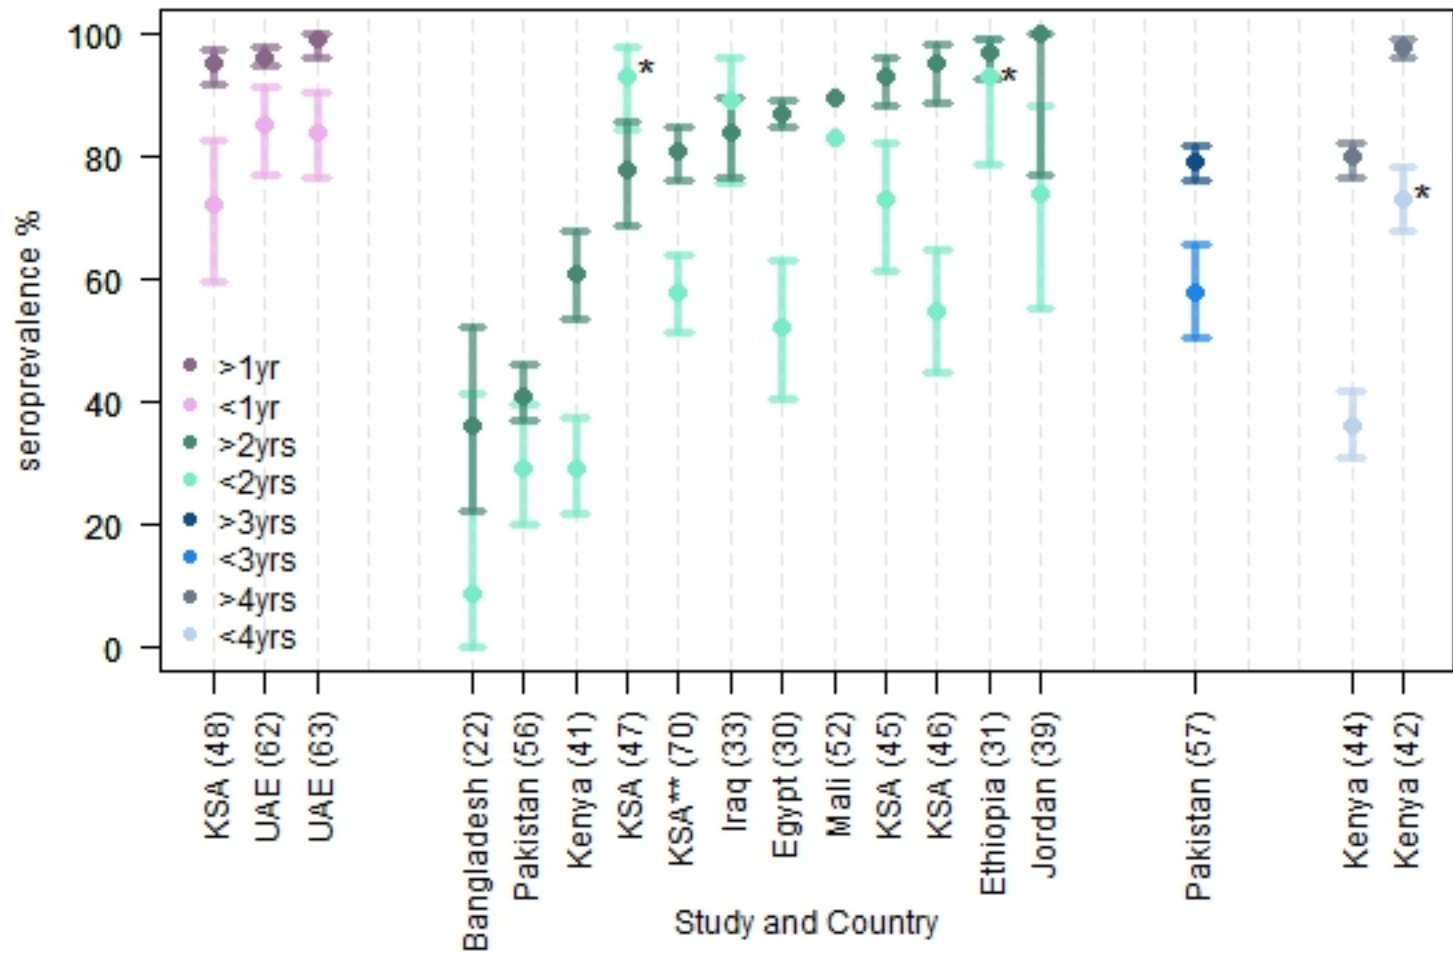

Fig3

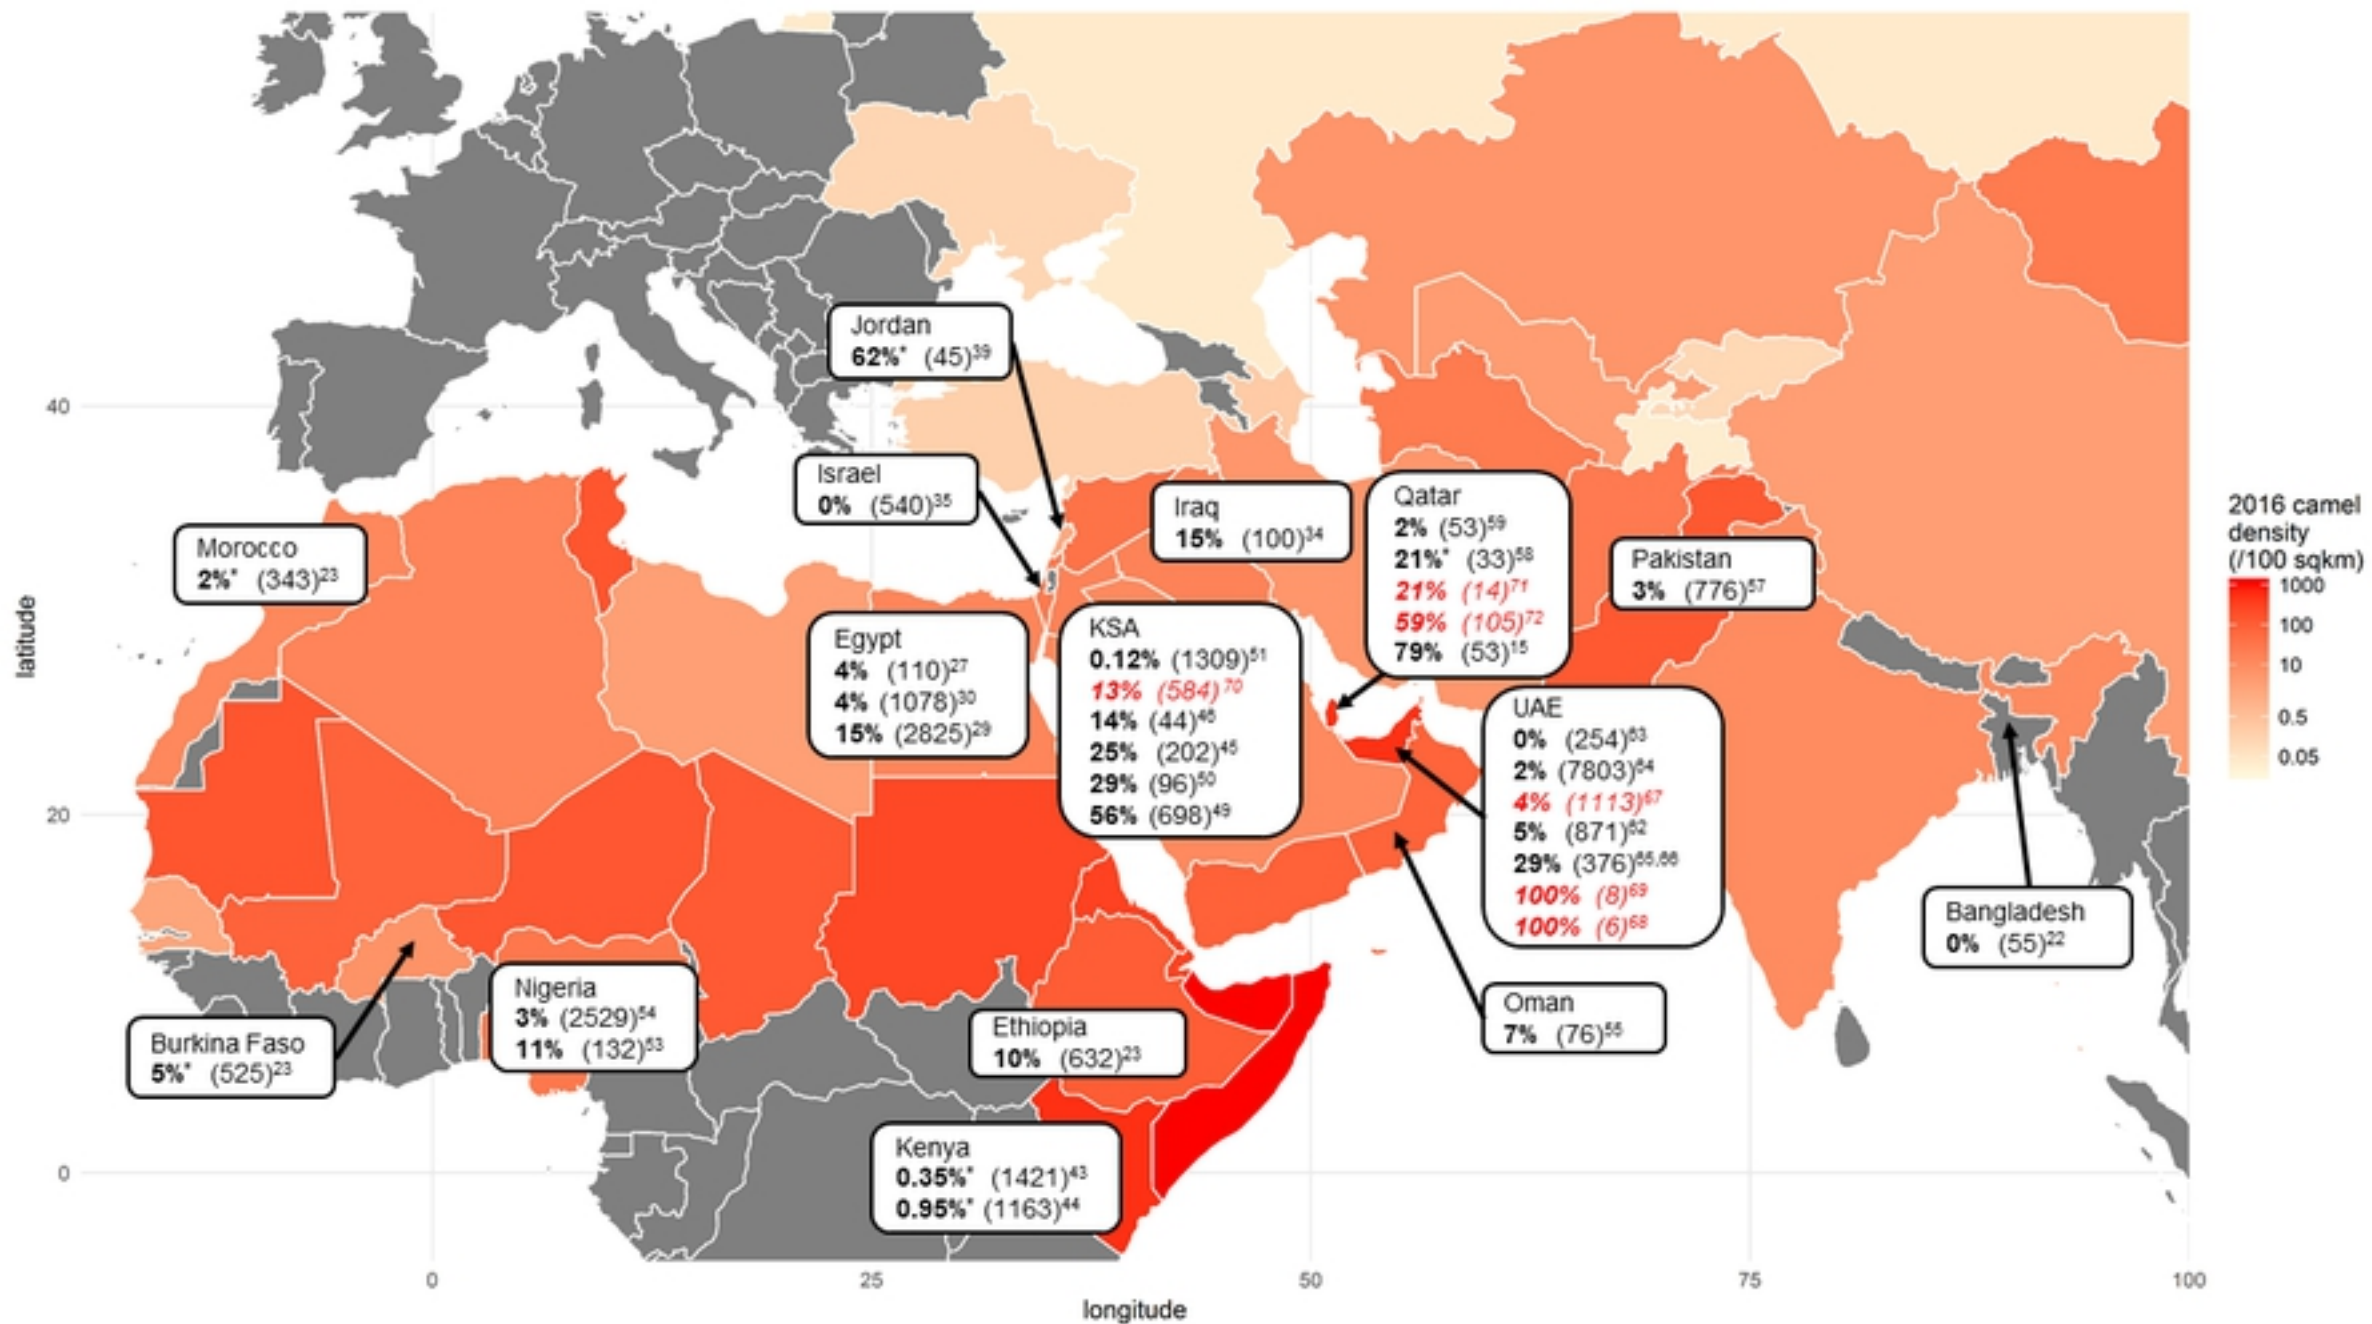

Fig4
